# Supplementary material
Source: PubMed Central journal article supplement (PMC4776468)

## Supporting Information Appendix

### Pliocene reversal of late Neogene aridification

J.M.K. Sniderman, J. Woodhead, J. Hellstrom, G.J. Jordan, R.N. Drysdale, J.J. Tyler, N. Porch

#### SUPPLEMENTARY MATERIALS AND METHODS

**Pollen analysis.** We attempted to extract fossil pollen from 81 speleothems collected from 16 caves from the Western Australian portion of the Nullarbor Plain. Nullarbor speleothems and caves are essentially “fossil” features that appear to have been preserved by very slow rates of landscape change in a semi-arid landscape. Sample collection targeted fallen, well preserved speleothems in multiple caves. U-Pb dates of these speleothems (Table S3) ranged from late Miocene (8.19 Ma) to Middle Pleistocene (0.41 Ma), with an average age of 4.11 Ma.

Fossil pollen typically is present in speleothems in very low concentrations, so pollen processing techniques were developed to minimize contamination by modern pollen (1), but also to maximize recovery, to accommodate the highly variable organic matter content of the speleothems, and to remove a clay- to fine silt-sized mineral fraction present in many samples, which was resistant to cold HF and which can become electrostatically attracted to pollen grains, inhibiting their identification. Stalagmite and flowstone samples of 30-200 g mass were first cut on a diamond rock saw in order to remove any obviously porous material. All subsequent physical and chemical processes were carried out within a HEPA-filtered exhausting clean air cabinet in an ISO Class 7 clean room. Samples were washed repeatedly in distilled, deionized water, then etched in dilute (c. 0.5 M) HCl for 10 minutes to remove the outer few 100  $\mu\text{m}$  of calcite, before washing repeatedly again in distilled water. Exotic *Lycopodium* spores (available in tablet form from Lund University, Sweden) were added to each sample in order to allow pollen concentrations to be estimated and to provide bulk for

30 centrifugation to act upon, before samples were dissolved in concentrated (12 M) HCl. The  
31 CaCl-rich solute was then diluted approximately four-fold with distilled water before  
32 centrifugation (3500 ppm for 3 minutes) to discard the solute component. Organic fractions  
33 were separated from residues using a Na-polytungstate heavy liquid (2) (empirical formula  
34  $\text{Na}_6\text{O}_{39}\text{W}_{12}$ ) made up to specific gravity 2.0. Those samples which yielded a substantial  
35 organic-rich supernatant were then immersed in 10% KOH at 80°C for 2-10 minutes.  
36 Following KOH, these samples, along with samples that yielded minimal organic  
37 supernatants, were dehydrated in 100% ethanol, then suspended in glycerol. Acetolysis was  
38 avoided in order to aid the identification of modern pollen contaminants (1).

39         The majority of speleothems contained  $\leq 0.1$  pollen grains  $\text{g}^{-1}$ , and, for most samples,  
40 no pollen was observed during complete scans of multiple glass slides representing  $\geq 50\%$  of  
41 the acid-resistant residue. Statistically meaningful quantities of pollen were recovered from  
42 13 speleothems, mostly flowstones, from five caves (Table 1). We initially incorporated  
43 Carrera marble blanks into our processing protocol in order to monitor contamination rates,  
44 but it quickly became clear that the majority of samples in any processing batch contained no  
45 fossil pollen. The 68 (84% of the total) processed speleothems that contained no detectable  
46 fossil pollen thus served as analytical blanks which provided an indication of the rate of  
47 contamination by modern pollen. In total, six obviously modern (retaining cell contents and  
48 in perfect condition) pollen grains (of four taxa, *Ulmus*, *Alnus*, *Plantago lanceolata* type, and  
49 Poaceae) were observed in six of the 81 residues, implying an extremely low rate of  
50 contamination, relative to the total number of fossil pollen grains, commensurate with our  
51 use of HEPA-filtered workstations for this work. The first three modern pollen types  
52 represent exotic taxa present in urban environments near our Melbourne laboratory, and  
53 easily identified if encountered in a polleniferous sample. Poaceae includes many native  
54 species, so modern contaminant grains conceivably could be mistaken for fossils. However,  
55 the observed rate of pollen contamination implies that the proportions of fossil Poaceae, 0-

56 3.3% of the pollen sum, might in reality be as much as 0.2% lower, or 0-3.1% of the sum, a  
57 small difference that does not affect our interpretation of late Neogene vegetation and  
58 climate. In order to assess the possibility that speleothem pollen was derived from the host  
59 limestone, we processed samples of the Early-Mid Miocene Nullarbor Limestone. No pollen  
60 grains were observed in these residues.

61 Where possible, >100 pollen grains were counted from each sample. To achieve this in  
62 some cases several aliquots of speleothem were dissolved, up to 760 g, and in most cases the  
63 entire acid- and alkali-resistant residue was examined. Pollen was counted under compound  
64 light microscopy at 640 and 1600 x magnification on a Zeiss Axiolab A1 with N-Achroplan  
65 objectives, and photographed on a Zeiss Axioscope A1 compound microscope with EC Plan-  
66 Neofluar objectives. All identified pollen types were included in pollen sums. The size of  
67 pollen sums unavoidably varied by approximately one order of magnitude, which entailed  
68 large variability in confidence estimates of pollen percentages (3). We therefore computed  
69 95% confidence intervals for observed pollen percentages (3, 4) in order to explicitly  
70 account for this variability. Deteriorated and unidentifiable grains were observed in low  
71 quantities, but generally pollen was either in acceptable to excellent condition, or absent.

72 Pollen and spore identifications were made by comparison with pollen reference  
73 collections and with published pollen atlases, including the Australasian Pollen and Spore  
74 Atlas ([apsa.anu.edu.au](http://apsa.anu.edu.au)). For taxonomic groups for which existing knowledge of pollen  
75 morphological diversity was poor, new modern pollen reference material was generated by  
76 sampling voucher specimens at the National Herbarium of Victoria (MEL), supported by  
77 new collections in the field. For *Banksia* (Proteaceae), which includes approximately 170  
78 species, we took advantage of the availability of a nearly complete species level molecular  
79 phylogeny based on five chloroplast DNA regions (5-7) to map pollen morphological  
80 features observed under light microscopy onto a phylogenetic framework. Below, pollen

81 nomenclature follows Punt et al. (8) and updates at <http://www.pollen.mtu.edu/glos-gtx/glos->  
82 [int.htm](http://www.pollen.mtu.edu/glos-gtx/glos-int.htm).

83 **Speleothem pollen taphonomy.** Below, we briefly summarize current understanding of  
84 modes of pollen transport into caves, before considering the role of taphonomic processes in  
85 the transport and preservation of pollen in Nullarbor speleothems. Although rates of pollen  
86 deposition in caves are typically much less than in lake sediments, studies indicate that cave  
87 sediment pollen spectra are representative of the surrounding vegetation (9), and similar to  
88 the spectra found in nearby outdoor pollen traps and small lakes (9, 10). Pollen may be  
89 brought into caves within drip water, through airborne transport, by animals, or by streams  
90 (11). The status of drip waters as pollen sources is equivocal, with some studies finding  
91 substantial quantities of pollen in drip water (12), others finding very little or none (10, 11).  
92 Studies of airborne pollen transport and deposition within caves indicate that the quantities  
93 of deposited pollen decrease with distance into the cave (9, 10). Where pollen is transported  
94 into caves by animals, its impact on pollen spectra is expected to increase with cave depth, as  
95 airborne pollen fluxes decline (13, 14).

96       The Nullarbor Plain is a broad surface of low relief, with limited deformation of its  
97 horizontally oriented stratigraphy since its emergence from the sea during the mid-late  
98 Miocene (15). There are no known lithological sources of reworked pollen on the Nullarbor  
99 Plain other than the Nullarbor Limestone itself (which contained no pollen, see above).  
100 Speleothems were collected from caves at depths below surface of 10-20 m. Drip water flow  
101 paths are interpreted to be relatively simple through the overlying epikarst. Modern entrances  
102 to late Neogene Nullarbor caves are unlikely to have persisted in the landscape for more than  
103 a few 100 kyr, and are uninformative about the location of cave entrances at the time of  
104 speleothem growth during the late Neogene. Thus, we do not know the position of any  
105 speleothem with respect to cave openings at the time of its growth.

106           The acid-resistant residues of approximately 60% of the 81 processed speleothem  
107 samples contained only small amounts of quartz and/or other siliciclasts. The remaining  
108 ~40% included a silt- to clay-sized biogenic and mineral fraction comprising fungal spores,  
109 charcoal and heavy minerals, which we interpret as airborne dust. Of these, 13 samples  
110 included usable concentrations of pollen. The simplest interpretation of this pattern is that  
111 the ‘clean’ Nullarbor speleothems grew at times when their caves had no connection to the  
112 surface, while those containing biogenic/mineral dust fractions grew at times when their  
113 caves had one or more entrances open to the atmosphere, allowing dust to be introduced onto  
114 growing speleothem surfaces. Because the polleniferous samples represent a subset of  
115 samples containing biogenic and mineral dusts, we infer that pollen was not generally  
116 derived from drip waters, but from the atmosphere. This interpretation implies that, at least  
117 for Nullarbor caves, the presence of fossil pollen within speleothems depends both on a cave  
118 having had  $\geq 1$  entrances at the time of speleothem growth, and on other conditions at the  
119 speleothem surface having being favourable for pollen preservation. The nature of these  
120 conditions is unknown; speculatively, the first order condition may be the need for  
121 speleothem growth rate to be above some minimum threshold. It is currently difficult to test  
122 this assumption because late Neogene speleothem U-Pb  $2\sigma$  age errors are of the order of 100  
123 kyr. In addition to an airborne component, the surprisingly strong representation of some  
124 animal-pollinated taxa, such as *Geniostoma*, implies that animals (presumably insects, based  
125 on the modern bird and insect pollination ecology of the genus in New Zealand(16)) were a  
126 quantitatively important pollen source. Idiosyncratic, animal-derived pollen spectra may be  
127 expected in speleothems remote from entrances(10), but the presence of *Geniostoma* pollen  
128 in speleothems from three caves also may imply that the source species was a cave-entrance  
129 habitat specialist, which is perhaps consistent with the fire-free habitat of *Geniostoma* today  
130 in New Zealand, other Pacific islands, and in northeastern Australian rainforest.

131 **Pollen identification and interpretation of pollen assemblages.** The Nullarbor speleothem  
132 pollen record demonstrates a new approach for revealing the environmental history of  
133 currently arid or semi-arid regions, particularly where, as in Australia, late Neogene  
134 aridification (17) has inhibited the preservation of most non-vertebrate fossil materials over  
135 very large areas, and very limited tectonic activity has inhibited the accumulation of thick  
136 sequences of the fine-grained lacustrine and fluvial sediments that typically preserve fossil  
137 pollen (18). Consequently there are very few late Neogene fossil pollen or paleobotanical  
138 records in Australia remote from the well-watered continental margins (18). It is thus not  
139 surprising that the late Miocene and Pliocene Nullarbor pollen archive indicates the presence  
140 of plant taxa (e.g. *Doryanthes* and *Geniostoma*) that have not been recorded previously in the  
141 late Cenozoic Australian plant fossil record. Carbonate lithologies typically generate neutral  
142 to alkaline soils that in many regions differ significantly in their characteristics for plant  
143 growth compared to soils developed on silicic lithologies, so speleothem fossil pollen  
144 assemblages may include taxa that are absent from or rare in pollen records from silicic  
145 landscapes. For example, in the British Late Quaternary Murton et al (19) found that  
146 speleothem fossil pollen assemblages reflected the flora of a limestone region which was not  
147 well documented by pollen records from silicic landscapes. In addition, speleothem pollen  
148 assemblages from the very extensive and flat Nullarbor Plain are very likely to avoid the  
149 pervasive bias towards wetland plant communities that routinely affects fossil pollen  
150 assemblages from lakes and wetlands (20). In examining Nullarbor fossil pollen  
151 assemblages, we encountered three distinctive pollen types (*Geniostoma*, *Doryanthes*, and  
152 *Banksia/Phanerostomata* eastern clade) which do not appear to be documented previously in  
153 the Australasian Cenozoic or Quaternary palynological literature. We undertook new  
154 analyses to identify these pollen types.

155 The Nullarbor pollen record is robust because each pollen sample is derived from a  
156 separate radiometrically dated speleothem, with ages directly traceable to the EarthTime

157 initiative reference materials ([www.earth-time.org](http://www.earth-time.org)). This distinguishes it from other  
158 terrestrial records of Southern Hemisphere Pliocene vegetation (21). The record also  
159 contrasts with marine pollen records, which in some cases have broadly reliable chronologies  
160 based on biostratigraphy and/or magnetostratigraphy, but which typically integrate pollen  
161 from sub-continental regions. For example, a Late Quaternary marine sediment core taken  
162 115 km offshore of North Island, New Zealand, integrated pollen derived from 400-500 km  
163 of coastline, conflating the vegetation histories of cool- and warm-temperate forest biomes  
164 (22). By contrast, speleothems preserve pollen derived from local to regional vegetation (11),  
165 implying pollen source radii of <10 km. Differences between the pollen assemblages of  
166 coeval speleothems from the five Nullarbor caves, with a mean inter-cave distance of ~25  
167 km (range 7-60 km), may therefore be explained partly by vegetation patchiness or by other  
168 poorly understood taphonomic processes, especially given that some pollen types which are  
169 found inconsistently (*Banksia*, Doryanthaceae) are animal-pollinated. However, the pollen  
170 spectra of Pliocene samples younger than c. 4.9 Ma, derived from four different caves, are all  
171 consistently dominated by *Eucalyptus*, implying that the record as a whole is representative  
172 of regional vegetation. Moreover, the shallow climatic and vegetation gradients that  
173 characterize the Nullarbor Plain today (23) are determined by the region's limited  
174 topographic relief (Fig S1B), which has changed little during the late Neogene (24). We  
175 therefore conclude that the patterns of vegetation and climate change revealed in the  
176 speleothem record are representative of Pliocene environments across central southern  
177 Australia.

178 **Paleoprecipitation estimates.** We estimated mean annual precipitation for the 13 pollen  
179 assemblages, based on a probabilistic extension of the mutual climatic range approach (25-  
180 28). We interpreted the affinities of the Nullarbor fossil pollen types to extant plant taxa or  
181 clades (see Supplementary Information), and then gathered modern occurrence data for these  
182 taxa or clades. We drew on publically accessible online databases of plant occurrence data,

183 for Australia, New Zealand, and globally. For Australia, we acquired data from the Atlas of  
184 Living Australia (ALA) ([www.ala.org.au](http://www.ala.org.au)), NatureMap (29), the Australian Ecological  
185 Knowledge and Observation System maintained by the Terrestrial Ecosystem Research  
186 Network at the University of Adelaide (<http://www.tern.org.au>); The New Zealand National  
187 Vegetation Survey Databank maintained by Landcare Research, New Zealand  
188 (<https://nvs.landcareresearch.co.nz>); and the Global Biodiversity Information Facility  
189 ([www.gbif.org](http://www.gbif.org)). These databases contain large quantities of data, the great majority of which  
190 is presence only (PO) data. PO data demonstrates the presence of a taxon at a particular time  
191 and place but does not necessarily provide a reliable indication of locations where that taxon  
192 is absent (30).

193 For species distribution modeling (31), the limitation of PO data is that they cannot  
194 provide a reliable estimate of species prevalence, or the proportion of sites in the region of  
195 interest in which a species is present (32), largely because the opportunistic and selective  
196 nature of species occurrence records means that PO data suffer from strong sampling biases  
197 (for example, there are more records near cities, and along roads within remote regions). It is  
198 thus difficult to generate quantitative estimates of the probability of occurrence of a species  
199 or taxon from PO data, as a function of selected climate (or other environmental) parameters  
200 (33, 34). We therefore restricted our data search to systematic survey data, in which multiple  
201 species records from a single site include (at least nominally) all plant taxa that were present  
202 at the time of survey. By implication, it can be assumed that taxa not recorded within a  
203 survey were actually absent from the site when it was surveyed. For interpretation of the  
204 probability of occurrence of a taxon as a function of one or more environmental variables,  
205 these presence/absence data are less influenced by sampling biases because densely sampled  
206 regions harbor more presences but also more absences (35). While absences may be  
207 unreliable for taxa that are rare or difficult to detect (36), our taxa of interest are either  
208 perennial shrub to tree sized plants, or, in the case of monocotyledonous *Doryanthes*, a



209 highly distinctive giant rosette plant. It is unlikely that any of the taxa would be missed in  
210 even a cursory vegetation survey, unless locally very rare (but in which case it is unlikely  
211 they would have contributed to a pollen flora).

212 We downloaded vascular plant data for Australia, using as filters the following  
213 exclusions: exotic species, records of cultivated specimens, records prior to 1970, spatially  
214 suspect records, records explicitly within non-native vegetation, and records with taxon  
215 identification issues. We recovered plant surveys from two sources: datasets of explicit  
216 regional to State-level plant surveys, included within online databases; and our own inferred  
217 surveys, which were extracted by filtering species occurrence data according to the following  
218 rules: groups of species occurrences were treated as “surveys” where they shared a species  
219 name, latitude and longitude (in some cases after smoothing to three significant digits),  
220 collector name, locality and site name (where supplied), and collection date (smoothed to  
221 one week to account for surveys that were conducted over several days). From the resulting  
222 sets of records, we excluded sets consisting of small numbers of species, typically less than  
223 ten, which we considered were unlikely to represent complete surveys of field quadrats or  
224 survey areas. We arbitrarily excluded sets of records containing more than 200 species, on  
225 the assumption that these sets most likely represented artificially precise geocoding of  
226 observation records during extensive plant collecting within an area substantially larger than  
227 a field plant survey (typically up to c. 0.1 ha). The resulting filtered dataset consisted of  
228 more than 101,000 sets of Australian plant species, herein referred to as “surveys”. We  
229 scored the survey dataset for presence/absence of our target taxa: Gyrostemoaceae;  
230 *Glischrocaryon* and *Haloragodendron* (indistinguishable palynologically, and possibly  
231 phylogenetically: *Haloragodendron* is paraphyletic with respect to *Glischrocaryon*,  
232 according to the phylogeny of Chen et al. (37); Casuarinaceae; *Corymbia/Angophora*  
233 (indistinguishable palynologically); *Eucalyptus*; *Banksia* clades /*Cryptostomata*,  
234 /*Phanerostomata* 1, 2E and 2SW; Ericaceae; Asteraceae Cichorioideae; *Doryanthes*.

235 Two clades (*Geniostoma* and Chenopodiaceae) required special treatment because the  
236 survey data described above were inadequate for these taxa. *Geniostoma* occurs in only two  
237 of the >101,000 Australian surveys (Fig. S2M). We therefore acquired survey records of  
238 *Geniostoma* from two landmasses in which it is a widespread and common genus: for New  
239 Zealand, we recovered c. 5500 vascular plant surveys from The New Zealand National  
240 Vegetation Survey Databank (Fig. S2K, L). However, the New Zealand climate space is  
241 truncated at mean annual temperatures above c. 16°C, so we generated ‘pseudo-surveys’  
242 from detailed distribution data of Hawaiian *Geniostoma* spp (as *Labordia*), from Price et al.  
243 (38). Price et al. provide high-resolution maps of modelled historical distributions of species  
244 of *Labordia*, based on all available species records. We created a 1.5’ grid (approximately  
245 7.3 km<sup>2</sup>) for the Hawaiian archipelago, and scored the centroid of each cell for presence or  
246 absence of *Labordia* according to the maps described above. The result was therefore  
247 equivalent to presence absence point data with matching climate data. The resulting pseudo-  
248 surveys (Fig. S7B) were then combined with the New Zealand data and analyzed using the  
249 same methods as for all taxa except Chenopodiaceae. For Chenopodiaceae, recent taxonomic  
250 changes (the transfer of chenopods to Amaranthaceae (39)) resulted in an error within ALA  
251 in which species belonging to the former Chenopodiaceae had been transferred out of that  
252 family, but not yet transferred into Amaranthaceae. As a result, no records for this clade  
253 were returned from ALA searches based on locations. We therefore modelled climate  
254 parameters for the former Chenopodiaceae based on modern pollen-vegetation relationships,  
255 requiring a different analytical approach (see below).

256 Mean annual precipitation was reconstructed based on probability distribution  
257 functions inferred using generalized additive modeling (GAM), implemented using the gam  
258 function in the mgcv package (40) in R (41). The approach for all clades except  
259 Chenopodiaceae was as follows: for each survey location we used an SRTM-derived 1  
260 second digital elevation model to infer site altitude, and then used this data combined with

261 latitude and longitude to estimate mean annual precipitation at each survey location with  
262 ANUCLIM (42). For each clade we created a GAM with mean annual precipitation as the  
263 independent variable and presence/absence of the clade as the dependent variable, assuming  
264 a binomial distribution and a cubic regression spline. We then predicted the score for  
265 approximately 19,000 points along the range of the mean annual precipitation, and inferred  
266 that this score represented the probability of occurrence of that clade at that mean annual  
267 precipitation.

268         The probability function for the former Chenopodiaceae was assembled in a different  
269 way. The family is well represented in surface and pre-European wetland pollen samples,  
270 which can be used as modern analogues of fossil assemblages. We made the uniformitarian  
271 assumption that the relationship between the abundance of Chenopodiaceae pollen in surface  
272 and pre-European wetland samples and climate can be used to predict past climates from the  
273 abundance of fossil Chenopodiaceae pollen. We used surface and pre-European pollen  
274 sample data documented in the southeast Australian pollen database (43) supplemented by  
275 modern pollen trap and late Holocene samples from southwestern Australia (44, 45). A  
276 Gaussian GAM based on a cubic regression spline was created with the abundance of  
277 Chenopodiaceae pollen in 159 samples as the independent variable and the log of mean  
278 annual precipitation for the collection site of each sample as the dependent variable. The log  
279 transformation ensured that the residuals were approximately normally distributed, which  
280 allowed us to infer the probability distribution of the predicted mean annual precipitation for  
281 a given abundance of Chenopodiaceae as the inverse Z distribution (approximated as the t-  
282 distribution with high degrees of freedom).

283         To calculate the joint probability function for each of the 13 Nullarbor fossil pollen  
284 samples relative to mean annual precipitation we multiplied the individual relative  
285 probability functions of each clade present within that pollen sample, then scaled the  
286 resulting function so that the cumulative total was 1. The data were truncated at  $\leq 2500\text{mm}$

287 mean annual precipitation because survey data from ALA are very sparse for climates wetter  
288 than this (representing less than 0.2% of all surveys) and the maximum values for most  
289 clades within each pollen sample were well below this number.

290 **Geochronology.** The analytical methods employed in this study follow closely those  
291 published previously by Woodhead et al. (46, 47). Multiple aliquots, typically weighing ~50  
292 mg, were removed from each speleothem sample using a dental drill. The pieces of calcite  
293 removed in this way were then placed into pre-cleaned disposable polyethylene cups and  
294 moved to a multiple-HEPA filtered clean room environment. Samples were briefly leached  
295 two times in very dilute (~0.01 M) three-times teflon distilled HCl, with each cycle lasting  
296 around one minute, and then repeatedly washed in ultra-pure water before being dried in a  
297 HEPA filtered laminar flow hood. This step is critical to the elimination of Pb contaminants  
298 resulting from sample handling which can easily dominate the Pb budget of the entire sample  
299 unless removed.

300 Individual samples were weighed into pre-cleaned teflon beakers and treated with  
301 sufficient 6N HCl to ensure complete dissolution. A mixed  $^{233}\text{U}$ - $^{205}\text{Pb}$  tracer, calibrated  
302 against EarthTime (<http://www.earth-time.org>) reference solutions, was then weighed into  
303 the vials and each one sealed and refluxed on the hotplate for several hours to ensure  
304 complete sample-spike equilibration. Samples were then dried down and taken up in 0.6N  
305 HBr for Pb separation using a single pass over AG 1X-8 anion exchange resin. The eluate  
306 from the first column (U + matrix) was subsequently processed through the same column  
307 now emptied of AG 1X-8 and refilled with Eichrom TRU ion-specific resin, to separate U.  
308 Pb blanks were typically  $10\pm 5\text{pg}$  and were corrected for. U blanks were insignificant relative  
309 to the amounts of U being processed.

310 Isotope ratios were determined on a Nu Plasma MC-ICPMS using a DSN-100  
311 desolvation unit and MicroMist glass nebulizer, operating in the range 50-100  $\mu\text{l}/\text{min}$  uptake.  
312 Instrumental mass bias effects were monitored and corrected using NIST SRM 981 reference

313 material in the case of Pb, and the sample's internal  $^{238}\text{U}/^{235}\text{U}$  ratio (=137.88) in the case of  
314 U. Instrument data files were processed initially using an in-house designed importer,  
315 operating within the Iolite environment (48) which considers all data and reference material  
316 analyses obtained throughout a particular analytical session and permits a variety of  
317 corrections for instrumental mass bias and drift. The resulting data, now corrected for  
318 instrumental effects, were then blank corrected and isotope-dilution calculations performed  
319 using the Schmitz and Schoene software (49).

320  $^{238}\text{U}/^{206}\text{Pb}$ - $^{207}\text{Pb}/^{206}\text{Pb}$  isochron regressions were calculated using 'Isoplot Ex'(50) and  
321 are labeled either 'Model 1' or 'Model 2', distinguished by MSWD less than or greater than  
322 2.5 respectively (Table S3). In the former it is assumed that the assigned analytical errors are  
323 the only source of data scatter and points are therefore weighted according to the inverse  
324 square of these uncertainties. In situations where the software detects a low probability of fit  
325 based upon assigned errors alone (i.e. there is likely additional geological scatter) a so-called  
326 'Model 2' fit is employed which instead assigns equal weights and zero error-correlations to  
327 each point. From a philosophical standpoint there are many reasons to move away from such  
328 'stepwise' changes in uncertainty handling and some attempts have been made by the  
329 geochronology community to move in this direction [e.g. ref (51)]. As yet, however, these  
330 robust statistical methods are yet to be implemented for the U-Pb system and so the  
331 traditional approach (and that invoked by Isoplot Ex) is employed in this study. Isochron  
332 ages were calculated using in-house software using the intersection of isochrons with an  
333 appropriate disequilibrium concordia, with decay constants from refs [(52, 53)], and  
334 assuming negligible initial  $^{230}\text{Th}$  ( $^{230}\text{Th}/^{232}\text{Th}$  activity ratios are typically in excess of 5,000  
335 but range up to ~50,000 (46). Any inaccuracies in final U-Pb age determinations caused by  
336 the assumption of zero  $^{230}\text{Th}$  only amount to ~10ka maximum and thus have minimal impact  
337 on the final uncertainty budget. There is no independent means of assessing the likely  
338  $^{234}\text{U}/^{238}\text{U}$  initial activity ratios of Nullarbor cave drip waters and thus it is impossible to

339 make a robust correction for initial U-isotope disequilibrium effects. We therefore impose a  
340 realistic (hence necessarily broad) range in initial activity ratio of  $1 \pm 0.3$  during calculation of  
341 disequilibrium-corrected ages. This is based upon measurement of 17 Pleistocene Nullarbor  
342 speleothems for which measurable disequilibrium values can be detected. These provide a  
343 total range in  $^{234}\text{U}/^{238}\text{U}$  initial from 0.7 to 1.2 (46, 54). For all samples this results in an  
344 increase in age of only  $\sim 100$  ka, within uncertainty of the uncorrected age.

345 **Iterative age modeling.** Each of our 13 pollen samples is derived from a separate  
346 speleothem. We therefore could not use stratigraphic superposition to evaluate their relative  
347 ages, but relied purely on the U-Pb age determination for each speleothem to build an age  
348 model for the pollen record. However, several speleothems have U-Pb ages with overlapping  
349  $2\sigma$  errors (Fig. 2; Table 1, Table S3). For any two speleothems with overlapping age errors,  
350 there is a finite probability that their true chronological sequence differs from that indicated  
351 by their median age estimates, and the closer together that they are with respect to their age  
352 uncertainties the more likely this is. We modeled these probabilities using a Monte Carlo  
353 procedure in which we iteratively sampled the Gaussian age distributions of each  
354 speleothem, repeating the process 100,000 times to develop a composite probability  
355 distribution which we summarize in terms of its median, lower and upper 1- and  $2\sigma$  values.  
356 Simulated ages which did not fall within  $2\sigma$  of any of the input age determinations were  
357 deleted, giving the effect of gaps in the simulated record where age determinations are  
358 separated by  $>2\sigma$ .

359 We undertook two Monte Carlo simulations. First, in order to model the temporal  
360 evolution of Nullarbor vegetation, a Monte Carlo procedure sampled the Gaussian  
361 probability distributions of each age determination as described above while simultaneously  
362 sampling the probability distribution of the observed pollen percentages, which follow a  
363 binomial distribution (4). Following Mosimann (4), we estimated a 95% confidence interval

364 for  $p$ , the true proportion of pollen type  $X$ , from  $\hat{p} = x/n$ , the number of grains of pollen type  
365  $X$  observed within a pollen sum of  $n$  grains (eqn 1).

366

$$367 \quad p_{0.95} = \frac{\hat{p} + \left[ \frac{(1.96)^2}{2n} \right] \pm (1.96) + \sqrt{\left[ \frac{\hat{p}(1-\hat{p})}{n} \right] + \left[ \frac{(1.96)^2}{4n^2} \right]}}{1 + \left[ \frac{(1.96)^2}{n} \right]} \quad (1)$$

368 By explicitly modeling how confidence in observed pollen percentages varies between  
369 samples with different pollen counts, this approach permitted us to include samples with  
370 highly variable pollen recovery, rather than simply discarding samples with relatively low  
371 yield on the basis that they fail to satisfy a minimum pollen count threshold. However,  
372 Mosimann's interval estimator assumes that confidence in any observation where  $\hat{p} = 0$  is  
373 simply a function of  $n$ , that is, all zeroes are simply 'sampling' zeroes (55). Given the ~5  
374 Myr span of the Nullarbor pollen record, encompassing three phylogenetically and  
375 climatically distinct biomes (late Miocene-earliest Pliocene, Early Pliocene, Mid  
376 Pleistocene), we preferred to risk making type II errors (treat source plants of unobserved  
377 pollen types as absent though they may in fact have been present) than type I errors (treat  
378 source plants of unobserved pollen types as present though they may in fact have been truly  
379 absent). We therefore treated zero percentage values as 'structural' or 'true' zeroes (55, 56),  
380 unless the  $2\sigma$  age of their host speleothem fell within the  $2\sigma$  age of another speleothem in the  
381 record that did show a non-zero count for that taxon.

382 Second, in order to model the temporal evolution of estimated Nullarbor mean annual  
383 precipitation, a Monte Carlo procedure sampled the Gaussian probability distributions of  
384 each age determination while simultaneously sampling from the empirical GAM-derived  
385 probability distributions (Fig. S4) of MAP for each of the 13 pollen assemblages.  
386 For both Monte Carlo simulations, the resulting probability cloud was binned into a two-  
387 dimensional histogram of 500 by 500 bins. A cumulative probability curve was compiled for

388 each time slice of the histogram that lies within  $2\sigma$  of an age determination, from which y-  
389 values were determined for the median, and for corresponding upper- and lower-95%  
390 confidence intervals.

391

392 **Time series analysis.** We located significant change points (57) in the mean of time series  
393 using the `cpt.mean` function in the `changept` package (58) in R (41). We used the exact  
394 method ‘Pruned exact linear time’ (59), with a manual penalty of  $2 \times \log(n)$ , but change point  
395 positions were identical using other methods. Prior to change point analysis, we resampled  
396 the 2.6-7 Ma interval of the benthic  $\delta^{18}\text{O}$  record of Zachos et al. (60) at a resolution of  
397 0.00126 Ma (the mean sampling interval of the original data over this interval). We  
398 recalculated the age models of the ODP 1095 and ODP 1165 records to align their control  
399 points with the 2012 geomagnetic polarity time scale (61).

400 **Evaluation of the ages of published Southern Hemisphere vegetation records.** We  
401 critically reviewed the quality of the age control of all Southern Hemisphere records  
402 interpreted by Salzmann et al. (21, 62) as evidence for Late Pliocene (the Piacenzian epoch)  
403 vegetation. We assigned conservative age estimates to each record (Table S1), defined in  
404 relation to the strength of age control. Thus we separated the purported Late Pliocene records  
405 into three broad categories based on decreasing geochronological accuracy and precision: (i)  
406 records in which purported ages are based on dated pyroclastics and/or magnetostratigraphy  
407 of long continuous sedimentary sections; (ii) records derived from marine sediments in  
408 which purported ages are based on biostratigraphic comparison of globally distributed  
409 marine faunas; (iii) records derived from terrestrial sediments in which purported ages are  
410 based on regional biostratigraphic comparison of terrestrial fossil faunas or floras. We refer  
411 to biostratigraphic comparisons as ‘formal’ when the basis for comparison is a published  
412 biostratigraphic scheme provided with age control through approaches (i) and/or (ii); and  
413 ‘informal’ when the basis for the comparison appears to be unpublished, unorganized, and/or



414 removed by several steps from radiometric dates and/or from sedimentary sections supplied  
415 with long, continuous magnetic polarity records. Where applicable, we estimated the  
416 offshore distance of marine sediment records, as an approximate guide to the size of land  
417 area that their pollen assemblages likely integrate.

418 We assigned very broad age ranges to most of the Australian vegetation records (Fig.  
419 1, Table S1) because their published age determinations generally rely on relatively far-field  
420 comparisons with the offshore Gippsland (18, 63, 64) or marginal marine Murray Basin (65,  
421 66) palynostratigraphies. While these are formal biostratigraphic schemes, their age control  
422 is in turn based largely on global comparisons of the first- and last appearance datums (FADs  
423 and LADs) of marine faunas. The timing of some of these events exhibit interbasin- and  
424 interhemispheric lags of epoch or sub-epoch scale (67). For example, the FADs of the  
425 biostratigraphically-important foraminifera *Globorotalia truncatulinoides* in the South  
426 Pacific (2.58 Ma) (68) and the South Atlantic (1.93 Ma) (68, 69) differ by 650 kyr, a lag  
427 which essentially straddles the entire Piacenzian epoch. Even where planktic foraminifera  
428 FADs are globally closely synchronous (68), dates recovered from the paleoceanographic  
429 literature may be based on geomagnetic polarity timescales that are now obsolete.

430 The resulting uncertainties can be illustrated by Hapuku-1, the only long, late Neogene  
431 pollen record derived directly within Gippsland Basin marine sediments. The two published  
432 versions of the Hapuku-1 chronology (18, 70) differ in their placement of the Early/Late  
433 Pliocene boundary by c. 300-400 m of sediment depth. Moreover, four Pliocene and Early  
434 Pleistocene FADs (of *Globorotalia puncticulata*, *G. inflata*, *G. tosaensis* and *G.*  
435 *truncatulinoides*) that form the basis for the most recently erected chronology (70) are out of  
436 sequence, according to the most recent iteration of the Geological Time Scale (68). These  
437 observations are consistent with Macphail's (18) conclusion with regard to southern  
438 Australian Pliocene pollen records, that "it is by no means certain that all terrestrial  
439 assemblages claimed to be Pliocene are correctly dated. This includes the widely cited

440 palynofloras from the Lachlan Valley (New South Wales)...(and)...Butchers Creek (NE  
441 Queensland)” ... Palynostratigraphic criteria developed for the Gippsland and Murray  
442 Basins...confirm that the first two sites are unlikely to be older than Late Miocene or  
443 younger than earliest Late Pliocene” (p. 429). An additional problem with dating terrestrial  
444 vegetation records by comparison with marine sediment stratigraphies is the possibility of  
445 diachronous timing of changes in vegetation between coastal lowlands and upland montane  
446 regions. For example, an independently dated ~300 kyr long pollen record from upland  
447 southeastern Australia (71) demonstrated the persistence until c. 1.5 Ma, during the Early  
448 Pleistocene, of several mesic taxa which in offshore marine sediments disappeared much  
449 earlier, during the Late Miocene or Pliocene (e.g. the angiosperm *Ilex* [*Ilexpollenites*  
450 *anguloclavatus*], and the fern *Lophosoria* [*Cyatheacidites annulatus*]). Therefore, we cannot  
451 exclude the possibility that published palynofloras considered “Pliocene”, primarily on the  
452 grounds that they include regionally to continentally extinct taxa, may be as young as Early  
453 Pleistocene.

454 For other landmasses, we re-assessed the age ranges of purported Late Pliocene records  
455 primarily by consulting the source publications. We assigned broad age ranges to records for  
456 which published ages were determined by (typically more or less informal) biostratigraphic  
457 comparisons. We took a skeptical view of the value of vegetation records based solely on  
458 vertebrate fossil assemblages or on geomorphic and sedimentological evidence, regardless of  
459 the quality of their age control. We consider that such records are unlikely to make  
460 unambiguous contributions to knowledge of Pliocene vegetation.

461

## 462 **Identification of fossils.**

### 463 ***Banksia* (Proteaceae)**

464 *Pollen of extant species*

465 The Pliocene Nullarbor pollen assemblages included a range of diporate Proteaceae  
466 morphotypes comparable to *Banksia*+*Dryandra* (5, 72). In order to assess the taxonomic  
467 affinities of these fossils, we examined the pollen morphology of representatives of  
468 monophyletic species groups identified by chloroplast phylogenies of *Banksia* s.l.  
469 (incorporating *Dryandra* (5, 6)). We examined nine species within *Banksia*/*Cryptostomata*  
470 (using the clademark convention of Baum et al. (73); herein, clade C), and 18 species within  
471 *Banksia*/*Phanerostomata* (herein, clade P; Fig. S5). We looked for both categorical and  
472 continuously varying pollen morphological characters that correspond to monophyletic  
473 groups, to provide a basis for objectively assigning fossil grains to infrageneric clades within  
474 *Banksia*. Pollen measurements were made on digital photomicrograph images in Adobe  
475 Illustrator, using the Astute Graphics Vector Scribe Dynamic Measure tool. Where pollen  
476 grains were crescent-shaped, as in some species of clade C, equatorial axes were measured  
477 along arcs parallel to the grain outline and extending between the pores. The length of the  
478 pollen equatorial axes were significantly different between clades C and P (clade C,  $n = 41$ ,  $\bar{x}$   
479 = 59.8  $\mu\text{m}$ ; clade P,  $n = 134$ ,  $\bar{x} = 34.1 \mu\text{m}$ ,  $p = 0.000$ , Table S2, Fig. S5A, B). Within our data  
480 set, overlap in the length of the equatorial axis between the two clades is minimal: the length  
481 of the equatorial axis of the smallest observed pollen grain in clade C, 44.3 $\mu\text{m}$ , represents the  
482 98.3 percentile of equatorial axis lengths observed in clade P grains.

483 Within clade P, a subclade confined to southwestern Australia which we refer to as P1  
484 (Table S2, Figs S2H, S5C, D) is characterized by two pollen morphological features that  
485 distinguish it from the remainder of clade P, which we refer to as clade P2. These features of  
486 clade P1 include a distinctly rugulate exine sculpture (Fig. S6X); and a narrow internal pore  
487 diameter, relative to grain size (Fig. S5C, D). Within clade P1 we observed one anomalous  
488 species, *B. grandis*, which has psilate, rather than rugulate pollen, and much larger pores  
489 relative to the length of its polar axis. Possible explanations for this anomaly include (i)  
490 incorrect phylogenetic placement of *B. grandis* in clade P1; (ii) the pollen morphological

491 features of *B. grandis* may reflect a history of reticulate evolution involving species outside  
492 of clade P1; or (iii) pollen morphological features of *B. grandis* may represent an  
493 autapomorphy for the species or for a small group of species within clade P1. However, *B.*  
494 *grandis*, with a polar axis length of 33-38  $\mu\text{m}$ , could not be mistaken for a member of clade  
495 P2, because the largest observed specimen in clade P2 had a polar axis of 30.2  $\mu\text{m}$ . Within  
496 clade P2, 30  $\mu\text{m}$  represents the 99.4 percentile of our polar axis length observations (Fig.  
497 S5D). Therefore, pollen of P1 is unlikely to be mistaken for pollen of P2, because the former  
498 is typically distinctly rugulate; or if not rugulate, has pollen which is larger than pollen of P1.

499 Clade P2 separates into two clades, which we refer to as clades P2SW and P2E, that  
500 are geographically confined, respectively, to southwestern Australian and to eastern and  
501 northern Australia (Fig. S2G). Pollen grains of clade P2SW are typically barrel-shaped in  
502 equatorial view, with a conspicuously biconvex amb, (Fig. S6V, W). By comparison, the  
503 outline of pollen grains of clade P2E are typically linear or plano-convex (Fig. S6M-O). We  
504 measured the mean radius of curvature (average of both sides of the grain) of the amb of  
505 seven species (48 spms) in clade P2E, and of six species (49 spms) in clade P2SW, and  
506 normalized the radius of curvature to the length of the polar axis. The resulting ratio of the  
507 radius of curvature to the length of the polar axis was significantly different between clades  
508 P2SW and P2E (clade P2SW,  $n=49$ ,  $\bar{x}=1.02$ ; clade P2E,  $n=48$ ,  $\bar{x}=2.64$ ,  $p=0.000$ , Table  
509 S2, Fig. S5E, F). However, there is some overlap between the two clades: the minimum  
510 value of the ratio in the clade P2E dataset, 1.317, represents the 86 percentile of the clade  
511 P2SW dataset (Fig. S5F). That is, our data suggest that there is nominally a 14% chance of  
512 mistaking a dispersed pollen grain of clade P2SW for a pollen grain of clade P2E.

513 We used these categorical (rugulate vs. non-rugulate exine sculpture) and continuous  
514 (equatorial axis length; ratio of polar axis length to internal pore diameter; ratio of the radius  
515 of curvature to the polar axis length) variables to develop a hierarchical classification of the  
516 modern acetolysed pollen of *Banksia*. We emphasize the separation of lineages within

517 /*Phanerostomata* because grains consistent with the latter numerically dominate our fossil  
518 assemblages:

519

520 ***Banksia*:**

521 1a. Equatorial axis length mostly  $\geq 45 \mu\text{m}$ : /*Cryptostomata*

522 1b. Equatorial axis length mostly  $< 45 \mu\text{m}$ : /*Phanerostomata*

523

***/Phanerostomata*:**

524 2a. Exine surface distinctly rugulate, polar axis/pore diameter ratio  $> 3.10$ :

525 /P1

526 2b. Exine surface psilate, apparently faintly reticulate, or otherwise not distinctly rugulate:

527 3.

528 3a. Polar axis  $> 33 \mu\text{m}$  *B. grandis* (/P1)

529 3b. Polar axis  $\leq 30 \mu\text{m}$ , polar axis/pore diameter  $< 3.72$ :

530 /P2

531 ***Phanerostomata* clade P2:**

532 Pollen grains strongly biconvex /P2SW

533 Pollen grain linear to plano-convex /P2E

534 2.1.2. Fossil pollen

535

536 ***Banksia /Cryptostomata* cf. *B. serrata*** (Proteales: Proteaceae)

537 (Fig. S6P, Q)

538

539 *Description*: Monad, anisopolar, outline in equatorial view, crescent shaped, pores 2, 4-9  $\mu\text{m}$

540 wide with wide collar, exine 1.3-2.7  $\mu\text{m}$  thick with several distinct layers, sculpture punctate

541 to faintly reticulate. Dimensions (unacetolysed): equatorial axis 33-42  $\mu\text{m}$ , polar axis 16-26

542  $\mu\text{m}$ .

543

544 *Botanical affinity: Banksia /Cryptostomata sensu* Mast and Givnish 2002. (Figs. S5G, and  
545 S6R, S)

546

547 *Discussion:* Acetolysed pollen of extant *B. serrata* is monad, anisopolar, outline in equatorial  
548 view crescent-shaped; pores 2, 6-9  $\mu\text{m}$  wide with wide collar, exine 1.5-3  $\mu\text{m}$  thick with  
549 several distinct layers, sculpture punctate to faintly reticulate. Dimensions: equatorial axis  
550 47-57  $\mu\text{m}$ , polar axis 20-29  $\mu\text{m}$ .

551

552 This thick-walled, crescent-shaped *Banksia* type with several distinct exine layers is  
553 consistent with the “*Banksia serrata* type” identified in some southeastern Australian late  
554 Quaternary palynological studies (74, 75) and with Paleogene and Neogene *Banksieaeidites*  
555 sp. cf. *Banksia serrata* of Macphail (66). However, while they share the general morphology  
556 of extant *B. serrata*, the fossil grains are consistently smaller (Figs. S5A, B and 8P-S). We  
557 attribute this difference to the use of acetolysis during the processing of the modern pollen,  
558 and its avoidance during the processing of fossil pollen, because acetolysis is known to  
559 increase the size of pollen grains (76). Similar size differences were noted (see below) for  
560 fossil *Banksia* pollen we attribute to */Phanerostomata*. Preliminary examination of pollen of  
561 several extant species of */Cryptostomata* indicated that pollen more or less indistinguishable  
562 from *B. serrata* can be found in some distantly related species (Fig. S6R, S), while that  
563 pollen of other */Cryptostomata* species have pollen which could not be mistaken for that of  
564 *B. serrata* (e.g. *B. baueri*, with a thin, psilate exine, and pores lacking a pronounced collar,  
565 positioned offset from the narrow ends of the grain). Based on these observations, we  
566 tentatively infer that the “*B. serrata* type” represents either a recurrent, homoplastic  
567 syndrome, or a generalized plesiomorphic type (77) within */Cryptostomata*. We thus do not  
568 interpret fossil “*B. serrata* type” as representing extant *B. serrata* or its direct ancestor, but  
569 simply as a member of *Banksia /Cryptostomata*.

570

571

***Banksia cf. /Phanerostomata***

572

***Banksia cf. /Phanerostoma P2E*** (Proteales: Proteaceae)

573

(Fig. S6I-L)

574

575 *Description:* Monad, anisopolar, outline in equatorial view rectangular to plano-convex, but  
576 weakly ellipsoidal to rectangular when (often) oriented in polar view. Pores 2, 4-12  $\mu\text{m}$   
577 wide, sculpture faintly reticulate. Dimensions (unacetolysed,  $n = 29$ ): equatorial axis 19-36  
578  $\mu\text{m}$ , polar axis 13-22  $\mu\text{m}$ .

579

580 *Botanical affinity:* *Banksia /Phanerostomata* [*sensu* Mast and Givnish 2002], clade P2E  
581 (Figs S5G, and S6M-O)

582

583

***Banksia cf. /Phanerostomata P2SW*** (Proteales: Proteaceae)

584

(Fig. S6T, U)

585

586 *Description:* Monad, anisopolar, outline in equatorial view usually strongly biconvex or  
587 barrel shaped. Pores 2, 3-7  $\mu\text{m}$  wide, sculpture apparently psilate to faintly reticulate.  
588 Dimensions (unacetolysed,  $n = 6$ ): equatorial axis 18-29  $\mu\text{m}$ , polar axis 14-22  $\mu\text{m}$ .

589

590 *Botanical affinity:* *Banksia /Phanerostomata* [*sensu* Mast and Givnish (5)], clade P2SW  
591 (Figs S5G, and S6V, W)

592

593 *Discussion:* As noted above, equatorial axis length largely distinguishes modern pollen of  
594 *Banksia* clade C from clade P. The fossil pollen grains are systematically smaller in size than  
595 modern grains because the former were not acetolysed, but the distinction between larger

596 grains, attributable to cf. *B. serrata*, and smaller grains, consistent with *Phanerostomata*,  
597 persists among the fossil grains (Fig. S5A, Table S2). We therefore conclude that the small,  
598 unacetolysed fossil *Banksia* pollen grains with equatorial axes generally <35 µm long and  
599 mostly <30µm long, represent fossils of *Phanerostomata* (herein abbreviated Pf). For these  
600 fossil grains, the ratio of polar axis length to internal pore diameter is significantly different  
601 from this ratio in modern pollen of clade P1, but is indistinguishable from modern pollen of  
602 clade P2 (Table S2, Fig. S5C, D). In addition, none of the fossil grains has the conspicuously  
603 rugulate exine sculpture (Fig. S6X) which characterizes most extant species of clade P1. We  
604 therefore interpret these fossil grains as belonging to clade P2. For these grains, the ratio of  
605 the radius of curvature to the polar axis (plotted for convenience in Fig. S5E as the  
606 equivalent ratio, equatorial axis/polar axis vs. equatorial axis/radius of curvature) is  
607 significantly different from this ratio in modern pollen of clade P2SW ( $p = 0.000$ ), but it is  
608 indistinguishable from modern pollen of clade P2E ( $p = 0.409$ , Table S2). The fossil pollen  
609 attributed to clade P2 thus plots predominantly within the Cartesian space occupied by clade  
610 P2E (Fig. S5E), and we interpret these fossils as representing the extant clade P2E, currently  
611 confined to eastern and northern Australia. However, a small number of grains plot within  
612 Cartesian space occupied solely by clade P2SW (Fig. S5E, F). These fossil grains have a  
613 strongly biconvex amb which was not observed in any extant species of clade P2E. The  
614 simplest interpretation of this pattern is that the fossil grains which we attribute to clade P2  
615 mostly have affinity with eastern and northern Australian clade P2E, but that a small number  
616 of grains have affinity to the endemic southwestern Australian clade P2SW.

617

618 ***Geniostoma* (Gentianales: Loganiaceae)**

619 (Fig. S6E-H)

620



621 *Description:* Monad, isopolar, pores prominent, costate, 3 to 5 in number, 7.2-(8.3)-9.3  $\mu\text{m}$   
622 in diameter, pores not lying in one plane in some 4- and 5-porate grains. Exine psilate or  
623 faintly rugulate, 1.3  $\mu\text{m}$  at equator, widening to 1.5-2.2  $\mu\text{m}$  near pores, nexine thickening  
624 near endoapertures. Shape: polar view, angulaperturate; equatorial view, oblate to oblate-  
625 spheroidal. Dimensions: equatorial axis 29  $\mu\text{m}$ ; polar axis 23  $\mu\text{m}$ .

626

627 *Botanical affinity:* *Geniostoma* (Loganiaceae)

628

629 *Discussion:*

630 This fossil pollen type with 3-5 pores, grains with  $\geq 4$  pores typically not lying in one plane,  
631 with psilate or faintly rugulate exine, and prominent nexine thickening near endoapertures,  
632 corresponds closely to the pollen of *Geniostoma* (Loganiaceae). Pollen of modern species  
633 was illustrated previously (78-80). Pollen of some endemic Hawaiian *Labordia* [viz. Type 1  
634 of Selling (78)], and *Geniostoma*-type of Punt and Leenhouts (79)) are indistinguishable  
635 from that of *Geniostoma*, consistent with Gibbons et al.'s (81) reduction of *Labordia* to  
636 synonymy with *Geniostoma* based on their finding that *Geniostoma* was paraphyletic with  
637 respect to *Labordia*. The sister clade to *Geniostoma* is ambiguous. Using chloroplast petD  
638 and nuclear ribosomal ETS, Gibbons et al. (81) found that *Geniostoma*+*Labordia* were sister  
639 to *Mitrasacme*+(*Phyllangium*+*Schizacme*), though the latter clade included one species of  
640 polyphyletic *Mitreola*. Using chloroplast regions petD and rps16, Foster et al. (82) recovered  
641 a phylogeny in which *Logania* sect. *Logania* is sister to *Geniostoma*+(*Mitreola*+*Logania*  
642 sect. *Stomandra*), and Foster et al. (83) erected *Orianthera* to accommodate *Logania* sect.  
643 *Stomandra*. However, the polyporate pollen of *Geniostoma* cannot be mistaken for  
644 tricolporate *Logania*, and all other genera within Loganiaceae appear to produce tricolporate  
645 or tricolpate pollen (79). Polyporate pollen with pores variably numbering 2-5 occur in  
646 Apocynaceae (in Australasia, viz. *Parsonsia*) but the exine in *Parsonsia* is very thin, with

647 protruding pores that have jagged margins (80, 84). We therefore conclude that the fossil  
648 represents *Geniostoma*.

649

650 *Geniostoma* species are small trees to small shrubs, sometimes scandent. The genus  
651 (including *Labordia*) is distributed from the Mascarene Islands, Malesia, Micronesia,  
652 Solomon and New Hebrides Islands, northeastern Australia, Lord Howe Island, northern  
653 New Zealand, Polynesia to Hawaii and Marquesas (85) (Fig. S2). In Australia, *Geniostoma*  
654 *rupestre* var *australianum* (F.Muell) B.J. Conn is an understory shrub or small tree in north  
655 Queensland rainforest (Australian Tropical Rainforest Plants, available at:

656 <http://www.anbg.gov.au/cpbr/cd-keys/rfk/>). Two species occur on Lord Howe Island:

657 *Geniostoma huttoni* is a scrambling shrub of dwarf closed forest on ridge tops, while *G.*  
658 *petiolosum* is a small tree to 5 m, occurring in forest at lower altitudes (*Flora of Australia*,  
659 Volume 49, 1994). One species, *G. ligustrifolium*, a ruderal, early successional shrub (86),  
660 occurs in New Zealand southwards to c. 41.5°S [ref (87)]( Fig. S2K, L).

661

## 662 ***Doryanthes* (Asparagales: Doryanthaceae)**

663 (Fig. S6A-C)

664

665 *Description:* Monad, anisopolar, monosulcate, sulcus extending the full length of the grain,  
666 margins ragged. Pollen ellipsoidal to obovate in equatorial view. Exine tectate, reticulate,  
667 simplicolumellate, with discrete columellae supporting the muri. Muri arranged in irregular  
668 polygonal shapes or rings, approaching a croton pattern on the side opposite the sulcus.  
669 Lumina diameter 1.6 µm, becoming smaller, and breaking down into a rugulate pattern,  
670 towards the sulcus. Exine thickness 2.2 µm along the longest grain axis, thinning to 1.7 µm  
671 along the short grain axis, sexine and nexine of similar thickness. Dimensions: equatorial  
672 axis 57 µm; polar axis 40µm.

673

674 *Botanical affinity: Doryanthes* (Doryanthaceae)

675

676 *Discussion:* Several features of the fossil – its size, exine thickness, simplicolumellate  
677 pattern (Fig. S6C), and its polygonal to croton-like lumina decreasing in size and breaking  
678 down into a rugulate pattern towards the sulcus (Fig. S6B) – correspond closely with the  
679 pollen of *Doryanthes*. These features distinguish this type from similarly large, robust  
680 (relatively thick exine with nexine and sexine of similar thickness), monosulcate pollen types  
681 of the Asparagales and Liliales.

682

683 However, monosulcate, ellipsoidal, reticulate pollen is apparently the plesiomorphic  
684 condition within the Asparagales and Liliales, and identification of fossil pollen with these  
685 characteristics has typically been at coarse taxonomic level, in both the Quaternary  
686 paleoecological and pre-Quaternary palynostratigraphic literatures. For example, for the past  
687 half century, monosulcate, reticulate, more or less ellipsoidal grains have routinely been  
688 referred to in the Quaternary literature imprecisely as “Liliaceae” (e.g. refs [(88, 89)]), while  
689 in the palynostratigraphic literature they are typically assigned to species of *Liliacidites*  
690 Couper (e.g. ref [(66)]). Attribution of these pollen type to extant taxa or clades has been  
691 inhibited by their lack of conspicuous pollen morphological variability, pervasive  
692 homoplasies (90), and, historically, by poor understanding of the evolutionary relationships  
693 of monocots (91).

694

695 Guided by current molecular phylogenetic frameworks for monocots, below we note  
696 palynological characteristics which distinguish Nullarbor fossil *Doryanthes* from several  
697 clades within Asparagales/Liliales, with an emphasis on families currently present in  
698 Australasia, based on a combination of published descriptions and our own observations

699 (where relevant, numbers following species names refer to MEL accession numbers).

700 Circumscription of taxa follows the Angiosperm Phylogeny Website wherever possible

701 (available at <http://www.mobot.org/MOBOT/Research/APweb/welcome.html>).

702

703 Relationships between Doryanthaceae and other Asparagales remain poorly resolved, but

704 until recently Doryanthaceae was hypothesized to be sister to Iridaceae+Ixioliriaceae (92).

705 The large, sulcate, reticulate pollen of some Iridaceae genera is broadly similar to that of the

706 fossil, and several of this family's plesiomorphic clades are endemic to Australia (93).

707 Following the chloroplast phylogeny of Goldblatt et al. (93), the most plesiomorphic clade,

708 monotypic Isophysidoideae, represented by *Isophysis tasmanica* [MEL 1523724] produces

709 pollen smaller than the fossil (equatorial axis 35-40  $\mu\text{m}$ ), and its exine is reticulate to

710 retipilate, heterobrochate with lumina up to  $\sim 4$   $\mu\text{m}$  diameter. In Goldblatt et al's second-

711 branching clade, Patersonioideae, *Patersonia occidentalis* has inaperturate, coarsely

712 reticulate pollen that tends to disintegrate under acetolysis. The pollen of Aristeoideae,

713 confined to Africa and Madagascar, and of Nivenioideae, confined to the Cape region of

714 South Africa, mostly have tectate reticulate exines that are not simplicolumellate under light

715 microscopic LO examination (94-96), and in which the lumina do not generally become

716 smaller as they approach the sulcus (94). The remainder of the family is represented by the

717 species-rich Crocoideae and Iridoideae. The most plesiomorphic Iridoideae clade,

718 Diplarreneae, represented by Australian *Diplarrena*, produces inaperturate pollen (97) or has

719 a poorly defined, smooth area on one face (96). *D. moraea* pollen is ellipsoidal to spheroidal,

720 with exine sculpture obscurely reticulate under bright-field light microscopy, perhaps

721 fossulate judging from scanning electron micrographs (96). Iridoideae pollen are typically

722 monosulcate, tectate columellate with a reticulate exine (96). Australian Iridoideae genera

723 include *Orthrosanthus* (*O. polystachyus* MEL 1523154], with a very dense reticulum

724 forming minute ( $\leq 1$   $\mu\text{m}$ ) lumina. The exine of African *Dietes* (e.g. *D. grandiflora*) is

725 simplicolumellate to retipilate, with anastomosing muri which do not break down into a  
726 rugulate pattern close to the sulcus. Crocoideae mostly have scabrate, rather than reticulate  
727 sculpturing (98). The pollen of *Watsonia* [*W. ?borbonica* MEL 2291132] and of *Romulea* [*R.*  
728 *rosea*, MEL 693772] is elongated, some grains having apiculate apices. Both genera have a  
729 verrucate, rather than reticulate exine sculpture.

730

731 Within Asphodelaceae, pollen of *Xanthorrhoea* (Xanthorrhoeoideae) is smaller (c. 40 x 35  
732  $\mu\text{m}$ ) than the fossil, with angular, irregular-shaped lumina circumscribed by thick muri that  
733 are not simplicolumellate. Hemerocallidoideae are characterized by trichotomosulcate pollen  
734 (99). The pollen of *Bulbine* (Asphodeloideae) is microreticulate to fossulate under SEM  
735 (100), or finely rugulate under bright field light microscopy.

736

737 In Amaryllidaceae, pollen of *Callostemma* [*C. luteum* MEL 285197] is large (60-70  $\mu\text{m}$ ) and  
738 reticulate but with very small ( $<1\mu\text{m}$ ) lumina and muri which are not simplicolumellate;  
739 pollen of *Crinum* [*C. flaccidum* MEL 2352573] is large (to 80 $\mu\text{m}$ ) with sparsely echinate  
740 exine sculpture.

741

742 In Boryaceae, pollen of *Borya sphaerocephala* [MEL 227391] is small (c. 30-40 $\mu\text{m}$  long),  
743 shortly ellipsoid, with a polygonal/vermiform reticulum. In Blandfordiaceae, pollen of  
744 *Blandfordia* has a granular exine (101). In Asteliaceae, pollen of *Astelia* is monosulcate and  
745 prominently echinate (84). In Hypoxidaceae, *Hypoxis* is finely reticulate, not  
746 simplicolumellate, and smaller than the fossil.

747

748 Pollen of Asparagaceae is generally smaller, with thinner exine, than the fossil. Pollen in the  
749 Lomandroideae, (e.g. *Arthropodium milleflorum*) is reticulate, with lumina becoming smaller  
750 towards the gaping sulcus but not breaking down into a rugulate pattern. Pollen of

751 *Thysanotus tuberosus* is typically much smaller than the fossil and has a reticulum with large  
752 lumina. Pollen of *Lomandra* and of *Acanthocarpus canaliculatus* [MEL 2211734] is  
753 zonosulcate.

754

755 Within the Liliales, Campynemataceae comprises two Australasian genera. The sulcate  
756 pollen of *Campynema* is small, with foveolate/reticulate exine and multicolumellate muri  
757 (102), while *Campynemanthe* is inaperturate (97). *Ripogonum* (Ripogonaceae) is smaller  
758 than the fossil, with finer reticulum, and is not simplicolumellate (103). In Colchicaceae,  
759 pollen of the Australian taxa *Burchardia* and *Wurmbea* are much smaller than the fossil, with  
760 finely reticulate exine sculpture.

761

762 Within the Commelinales, pollen in the Haemodoraceae is either bi-, tri- or polyporate  
763 (Conostylidoideae), or, under light microscopy, obscurely monosulcate (Haemodoroideae)  
764 (104, 105). Pollen of Philydraceae occurs in tetrads (*Philydrum*), or is monosulcate but small  
765 (25-40  $\mu\text{m}$ ) with exine sculpture that is obscure under light microscopy (106). In the  
766 currently unplaced commelinid family Dasypogonaceae (107), the pollen of *Calectasia* has  
767 clearly differentiated sexine and nexine similar to the fossil, and has a very fine,  
768 simplicolumellate reticulum in which, in contrast to the fossil, the lumina are approximately  
769 the same size as the individual columellae, and there is no change in the reticulum as it  
770 approaches the sulcus margin. *Baxteria australis* [MEL 2216188] has a retipilate exine in  
771 which the apertures are arranged in a pantocolpate or clypeate (108, 109) pattern. *Dasypogon*  
772 *hookeri* [MEL 2025855] is small and microreticulate, with lumina  $<1\mu\text{m}$  diameter. In  
773 *Kingia*, the sulcus extends around more than half of the grain (108).

774

775 *Comments:*

776 Monotypic, Australian endemic Doryanthaceae comprises two giant-rosette species.

777 *Doryanthes excelsa* occupies near-coastal sclerophyll forests and woodlands on well drained,

778 usually sandstone-derived soils in New South Wales. *D. palmeri* occupies rocky outcrops in

779 of wet sclerophyll forest within a small, near-coastal range straddling the New South

780 Wales/Queensland border (110).

781

782 **SUPPLEMENTARY FIGURE LEGENDS**

783 **Figure S1. Information about locations mentioned in the text.** (A) Australian mean  
784 annual precipitation, 1901-2010, derived from Global Precipitation Climatology Centre  
785 (GPCC) V6 at 0.5° resolution (111), plotted with Climate Explorer (112) (climexp.knmi.nl).  
786 Green circles, locations of the five caves from which fossil pollen was recovered. (B)  
787 Digital Elevation Model (3 second SRTM) of the Nullarbor Plain in southern central  
788 Australia with locations of the five caves shown, identified by their respective cave numbers.  
789 (C) Climate parameters for the five Nullarbor caves. Climatology derived from ANUCLIM  
790 (42).

791

792 **Figure S2. Distribution of individual taxa/clades mentioned in the text and used for**  
793 **reconstruction of mean annual precipitation, within the survey datasets.** (A)  
794 Distribution of all Australian surveys; (B-J, M) distribution of individual taxa/clades within  
795 the Australian survey dataset; (K) distribution of all New Zealand surveys; (L) distribution of  
796 *Geniostoma* within the New Zealand survey dataset. (N) Indo-Pacific presence-only  
797 occurrence records, derived from the Global Biodiversity Information Facility  
798 (www.gbif.org). (O) Distribution of *Geniostoma* (= *Labordia*) within ‘pseudo’-surveys in  
799 Hawaii.

800

801 **Figure S3. Modeled relationships between mean annual precipitation and probability of**  
802 **occurrence for 13 taxa/clades interpreted as the sources of pollen types observed in the**  
803 **Nullarbor pollen assemblages.** Lines of best fit and standard errors shown. (A-L) GAM  
804 probability density for each taxon/clade as a function of mean annual precipitation. Density  
805 functions were created from binomial GAMs based on the presence/absence of each taxon  
806 within the (A-K) Australian survey dataset, and (L) the New Zealand and Hawaiian survey  
807 dataset. (M) Relationship between mean annual precipitation and Chenopodiaceae pollen



808 percent, derived from southern Australian pre-European wetland and modern pollen trap data  
809 (43, 44, 113), estimated using a Gaussian GAM.

810

811 **Figure S4. Probability density for each of 13 pollen assemblages as a function of mean**  
812 **annual precipitation.** Probability density functions represent joint probabilities derived  
813 multiplicatively from the component pollen types contributing to each assemblage (indicated  
814 by capital letters referring to panels within Fig. S3).

815

816 **Figure S5. Pollen morphological measurements of clades within modern and fossil**  
817 ***Banksia*.** Species examined, for */Cryptostomata*, include *B. ashbyi*, *B. baxteri*, *B.*  
818 *candolleana*, *B. coccinea*, *B. cuneata*, *B. hookeriana*, *B. serrata*, *B. serratuloides*, *B.*  
819 *speciosa*. For */Phanerostomata* P1, *B. grandis*, *B. grossa*, *B. lanata*, *B. sphaerocarpa*, *B.*  
820 *violacea*. For */Phanerostomata* P2E, *B. aquilonia*, *B. canei*, *B. ericifolia*, *B. integrifolia*, *B.*  
821 *marginata*, *B. spinulosa*, *B. dentata*. For */Phanerostomata* P2SW, *B. brownii*, *B. nutans*, *B.*  
822 *occidentalis*, *B. quercifolia*, *B. seminuda*, *B. verticillata*.

823

824 **Figure S6. Photomicrographs of selected fossil pollen from Nullarbor speleothems.**

825 Scale bar for (A-D) shown in (A); scale bar for (E-W) shown in (E). (A-C) fossil  
826 *Doryanthes*, sample 370-11; (D) modern *Doryanthes excelsa*, acetolysed; (E-H) fossil  
827 *Geniostoma*, sample 2200-2; (I-L) fossil *Banksia* interpreted as */Phanerostomata* P2E  
828 (eastern clade), from sample 645-15; (M-O) modern pollen of */Phanerostomata* eastern  
829 clade: (M) *B. integrifolia*; (N) *B. aquilonia*; (O) *B. marginata*; (P-Q) fossil *Banksia*  
830 interpreted as */Cryptostomata*, sample 645-15; (R-S) modern pollen of */Cryptostomata*: (R)  
831 *B. candolleana*, (S) *B. serrata*; (T-U) fossil *Banksia* interpreted as */Phanerostomata* P2SW  
832 (southwestern clade), sample 645-15; (V-W) modern pollen of */Phanerostomata* P2SW: (V)

833 *B. verticillata*; (W) *B. quercifolia*. (X) Modern pollen of *Banksia* /*Phanerostomata* 1, *B.*

834 *grossa*, showing rugulate sculpture (not observed in fossil material).

835

836 **SUPPLEMENTARY TABLES**

837 **Table S1. Conservative age estimates of Southern Hemisphere data interpreted by**  
838 **Salzmann et al. (21, 62) as evidence for Late Pliocene vegetation.** Site numbers  
839 correspond to ref [(21)]. We excluded Antarctic sites based on uncertainties about their late  
840 Neogene age, following Salzmann et al. (62).

841 **Abbreviations:** Aus, Australia; PNG, Papua New Guinea; NZ, New Zealand; SA, South Africa.

842 **Notes:**

843 \* Chronostratigraphy is derived from McMinn (114), who commented, “Foram zone N19 and  
844 nannoplankton zone CN10 were not recognized in Hole 765B, indicating that much of the Early  
845 Pliocene is either absent or...unsampled”... “The absence of foram Zone N18 indicates that the  
846 uppermost late Miocene is either absent...or unsampled”. (p. 430).

847 † Key planktic foraminifera have epoch-scale inter-ocean basin diachronous ranges (see Methods).

848 ‡ The visual match of the Yallalie magnetic polarity record with the geomagnetic polarity timescale  
849 (61) is reasonable, but it is unconstrained by radiometric or internal (e.g. sedimentation rate  
850 estimates) evidence.

851 § Khan commented, “Faunally and lithologically it is not easy to separate Pliocene from Pleistocene  
852 sediments in the well section (115)(p 268).

853 || Described in 1988 as “Late Pliocene”, thus probably mostly, if not entirely now Early Pleistocene  
854 (116).

855 ¶ Reanalyses by Rossouw and Scott (117) cast doubt on the reality of the fossil pollen data.

856 # Described by the authors as “>4 to 1 Ma”.

857 ★ Described by the authors as “2.6-2.8 Ma”.

858 \*\* The record includes only a small portion attributed to the uppermost Pliocene, as defined in a 1987  
859 palynostratigraphic scheme. Thus the record is probably entirely Early Pleistocene (116)

860

**Table S1.**

| Site (site number)                      | Proxy              | Source          | Age control                                                                                            | Conservative age estimate           | Notes |
|-----------------------------------------|--------------------|-----------------|--------------------------------------------------------------------------------------------------------|-------------------------------------|-------|
| ODP 765, NW Aust (179)                  | pollen             | (118)           | marine biostratigraphic comparison (c. 400 km offshore), magnetostratigraphy                           | Late Pliocene                       | *     |
| Tempe Downs Borehole, Aust (180)        | pollen             | (18)            | terrestrial biostratigraphic comparison (informal)                                                     | Late Miocene to Early Pleistocene   |       |
| Namba Fm, Aust (180)                    | pollen             | (18, 119)       | palynostratigraphic comparison ( $\pm$ formal)                                                         | Late Miocene to Early Pleistocene   |       |
| Wipajiri and Tirari Fms, Aust (180-181) | pollen             | (18, 120)       | palynostratigraphic comparison ( $\pm$ informal)                                                       | Late Miocene to Early Pleistocene   |       |
| Northern Eyre Peninsula, Aust (180)     | pollen             | (18, 121)       | palynostratigraphic comparison ( $\pm$ informal)                                                       | Late Miocene to Early Pleistocene   |       |
| Hapuku-1 well, SE Aust (180)            | pollen             | (18)            | marine biostratigraphic comparison (c. 100 km offshore)                                                | Pliocene                            | †     |
| ODP 815 and 823, NE Aust (182-183)      | pollen             | (122)           | marine biostratigraphic comparison (c. 250 km offshore)                                                | Late Pliocene                       |       |
| Butchers Creek, Aust (184)              | pollen             | (123)           | palynostratigraphic comparison ( $\pm$ informal)                                                       | Late Miocene to Early Pleistocene   |       |
| Yallalie, Aust (185)                    | pollen             | (124, 125)      | palynostratigraphic comparison (formal); magnetostratigraphy                                           | Late Pliocene                       | ‡     |
| Lake Tay, Aust (186)                    | pollen             | (18, 126)       | palynostratigraphic comparison (formal)                                                                | Late Miocene to Early Pleistocene   |       |
| Lachlan Fm, Aust (189)                  | pollen             | (18, 127)       | palynostratigraphic comparison (formal)                                                                | Late Miocene to Early Pleistocene   |       |
| Lake George, Aust (188)                 | pollen             | (128)           | magnetostratigraphy (discontinuous sections)                                                           | Late Miocene to Early Pleistocene   |       |
| Linda Valley, Aust (193)                | pollen             | (129)           | palynostratigraphic comparison (formal)                                                                | Late Pliocene/Early Pleistocene     |       |
| Eastern Highlands, NSW, Aust (189)      | pollen             | (18, 130-132)   | palynostratigraphic comparison (formal)                                                                | Late Miocene to Early Pleistocene   |       |
| Kowai Fm, NZ (196)                      | pollen             | (133)           | palynostratigraphic comparison ( $\pm$ informal)                                                       | Pliocene/Early Pleistocene          |       |
| Five Fingers Peninsula, NZ (197)        | pollen             | (134)           | marine biostratigraphic comparison and palynostratigraphic comparison ( $\pm$ informal)                | Pliocene/Early Pleistocene          |       |
| Tadmor Group, NZ (198)                  | pollen             | (135)           | palynostratigraphic comparison ( $\pm$ informal)                                                       | Late Miocene to Early Pleistocene   |       |
| ODP 1123, Chatham Rise (199)            | pollen             | (136, 137)      | (c. 1100 km offshore), magnetostratigraphy (long continuous section)                                   | Late Pliocene                       |       |
| DSDP 262, Timor (177)                   | pollen             | (138)           | marine biostratigraphic comparison (c. 75 km offshore)                                                 | Early Pleistocene                   |       |
| Ivirin No. 1 Well, PNG (178)            | pollen             | (115, 139, 140) | marine biostratigraphic comparison (informal)                                                          | Late Miocene to Early Pleistocene   | §     |
| Mahakam Delta, Kalimantan (175)         | pollen             | (141)           | palynostratigraphic comparison ( $\pm$ informal)                                                       | Early Pleistocene                   |       |
| Laetoli, Tanzania (124, 126)            | Pollen/vertebrates | (117, 142, 143) | terrestrial biostratigraphic comparison (informal), dated pyroclastics                                 | Late Pliocene: but see note         | ¶     |
| Malawi Rift (125)                       | vertebrates        | (144)           | terrestrial biostratigraphic comparison (informal)                                                     | Early Pliocene to Early Pleistocene | #     |
| DSDP 532, SW Africa (127)               | pollen             | (145)           | marine biostratigraphic comparison (c. 200 km offshore); magnetostratigraphy (long continuous section) | Late Pliocene                       |       |
| ODP 1082, SW Africa (128)               | pollen             | (146)           | “wiggle matching” with benthic $\delta^{18}\text{O}$ (c. 160 km offshore)                              | Late Pliocene                       |       |
| Langebaanweg, SA (129)                  | pollen             | (147, 148)      | terrestrial biostratigraphic comparison (informal)                                                     | Miocene to Pliocene                 |       |
| Makapan Valley, SA (130)                | vertebrates        | (142)           | terrestrial biostratigraphic comparison (informal)                                                     | Pliocene, perhaps Late Pliocene     |       |
| Sterkfontein, SA (131)                  | wood               | (149)           | terrestrial biostratigraphic comparison (informal), magnetostratigraphy (short sections)               | Early Pleistocene                   | ★     |
| Lauca Basin, Chile (45)                 | Sediments          | (150)           | dated pyroclastics                                                                                     | Late Pliocene                       |       |
| Southern South America (46-47)          | vertebrates        | (151)           | terrestrial biostratigraphic comparison (far field, informal)                                          | Late Miocene to Early Pleistocene   |       |
| Buenos Aires Province, Argentina (48)   | vertebrates        | (152)           | magnetostratigraphy (discontinuous/short section)                                                      | Pliocene?                           |       |
| Foz de Amazonas Basin, Brazil (44)      | pollen             | (153)           | palynostratigraphic comparison (200 km offshore)                                                       | Early Pleistocene                   | **    |

863 **Table S2. Continuous pollen morphological criteria for separation of clades within**  
 864 ***Banksia*, and comparisons between modern and fossil *Banksia* pollen.**  
 865 Abbreviations: Cf, fossil /*Cryptostomata*; Pf, fossil /*Phanerostomata*; P1, P2, P2SW, P2E,  
 866 extant /*Phanerostomata* clades (see Fig. S5G)  
 867

| Clade comparison                   | Criterion                                   | Descriptives                                                                                                                 | Tests                                                                                                                                                                           |
|------------------------------------|---------------------------------------------|------------------------------------------------------------------------------------------------------------------------------|---------------------------------------------------------------------------------------------------------------------------------------------------------------------------------|
| C vs. P                            | Length of equatorial axis ( $\mu\text{m}$ ) | <b>C:</b> $n = 41$ , $\bar{X} = 59.8$<br>$\sigma^2 = 10.15$<br><b>P:</b> $n = 134$ , $\bar{X} = 34.1$<br>$\sigma^2 = 6.57$   | Levene test of homogeneity of variances:<br>F = 20.9, $p = 0.000$ (variances are unequal).<br>Two sample t = 15.3, (df = 51) $p = 0.000$ , mean difference = 25.7 $\mu\text{m}$ |
| P1 vs. P2                          | Polar axis/pore diameter                    | <b>P1:</b> $n = 30$ , $\bar{X} = 3.8$<br>$\sigma^2 = 0.78$<br><b>P2:</b> $n = 62$ , $\bar{X} = 2.6$<br>$\sigma^2 = 0.36$     | Levene test of homogeneity of variances:<br>F = 21.6, $p = 0.000$ (variances are unequal).<br>Two sample t = 8.4 (df = 35) $p = 0.000$ , mean difference = 1.26                 |
| P2 SW vs. P2 E                     | Radius of curvature/polar axis              | <b>P2SW:</b> $n = 49$ , $\bar{X} = 1.0$ $\sigma^2 = 0.28$<br><b>P2E:</b> $n = 48$ , $\bar{X} = 2.6$<br>$\sigma^2 = 2.14$     | Levene test of homogeneity of variances:<br>F = 9.25, $p = 0.003$ (variances are unequal).<br>Two sample t = 5.2 (df = 49) $p = 0.000$ , mean difference = 1.62                 |
| Cf (cf. <i>B. serrata</i> ) vs. Pf | Length of equatorial axis                   | <b>Cf:</b> $n = 14$ , $\bar{X} = 36.6$<br>$\sigma^2 = 3.71$<br><b>Pf:</b> $n = 35$ , $\bar{X} = 24.8$ ,<br>$\sigma^2 = 3.95$ | Levene test of homogeneity of variances:<br>F = 0.14, $p = 0.709$ (variances are equal).<br>Two sample t = 9.7 (df = 47) $p = 0.000$ , mean difference = 11.9                   |
| P1 vs Pf                           | Polar axis/pore diameter                    | <b>P1:</b> $n = 30$ , $\bar{X} = 3.8$<br>$\sigma^2 = 0.78$<br><b>Pf:</b> $n = 33$ , $\bar{X} = 2.6$<br>$\sigma^2 = 0.67$     | Levene test of homogeneity of variances:<br>F = 1.79, $p = 0.186$ (variances are equal).<br>Two sample t = 6.9 (df = 61) $p = 0.000$ , mean difference = 1.3                    |
| P2 vs Pf                           | Polar axis/pore diameter                    | <b>P2:</b> $n = 48$ , $\bar{X} = 2.6$<br>$\sigma^2 = 0.36$<br><b>Pf:</b> $n = 33$ , $\bar{X} = 2.6$ $\sigma^2 = 0.67$        | Levene test of homogeneity of variances:<br>F = 5.96, $p = 0.016$ (variances are unequal).<br>Two sample t = 0.005 (df = 42) $p = 0.996$ mean difference = 0.0006               |
| P2E vs Pf                          | Radius of curvature/polar axis              | <b>P2E:</b> $n = 48$ , $\bar{X} = 2.6$<br>$\sigma^2 = 2.14$<br><b>Pf:</b> $n = 33$ , $\bar{X} = 3.1$ $\sigma^2 = 2.89$       | Levene test of homogeneity of variances:<br>F = 4.51, $p = 0.037$ (variances are unequal).<br>Two sample t = 0.83 (df = 55) $p = 0.409$ mean difference = 0.49                  |
| P2SW vs Pf                         | Radius of curvature/polar axis              | <b>P2SW:</b> $n = 49$ , $\bar{X} = 1.0$ $\sigma^2 = 0.28$<br><b>Pf:</b> $n = 33$ , $\bar{X} = 3.1$ $\sigma^2 = 2.89$         | Levene test of homogeneity of variances:<br>F = 34.76, $p = 0.000$ (variances are unequal).<br>Two sample t = 4.2 (df = 32) $p = 0.000$ mean difference = 2.11                  |

868 **Abbreviations:** Cf, fossil /*Cryptostomata*; Pf, fossil /*Phanerostomata*; P1, P2, P2SW, P2E,  
 869 extant /*Phanerostomata* clades (see Fig. S5G)  
 870  
 871

872 **Table S3. U, Pb concentration and isotope ratio data for Nullarbor speleothems found**  
873 **to contain pollen.** Sample codes take the form of ‘cave number-sample number’. Isotope  
874 ratio uncertainties are quoted at the 2σ level. See Methods section for details of age  
875 calculations.  
876

| Sample ID | Aliquot # | U ppm | Pb ppm | <sup>206</sup> Pb/ <sup>204</sup> Pb | <sup>238</sup> U/ <sup>206</sup> Pb | % error | <sup>207</sup> Pb/ <sup>206</sup> Pb | % error | Correlation coefficient | Isochron type | MSWD | Corrected Age (Ma) | Uncertainty 95% conf. |
|-----------|-----------|-------|--------|--------------------------------------|-------------------------------------|---------|--------------------------------------|---------|-------------------------|---------------|------|--------------------|-----------------------|
| 2121-1    | 1         | 0.497 | 0.0002 | 27.274                               | 9832.94                             | 28.76   | 0.46762                              | 27.10   | -0.9999                 | Model 2       | 4.1  | 0.41               | 0.07                  |
|           | 2         | 0.487 | 0.0034 | 14.996                               | 486.29                              | 1.56    | 0.80937                              | 0.33    | -0.4949                 |               |      |                    |                       |
|           | 3         | 0.511 | 0.0022 | 18.667                               | 785.78                              | 1.82    | 0.79647                              | 0.28    | -0.8455                 |               |      |                    |                       |
|           | 4         | 0.499 | 0.0032 | 20.896                               | 526.83                              | 2.91    | 0.81326                              | 0.63    | -0.4708                 |               |      |                    |                       |
| 645-15    | 1         | 0.596 | 0.0006 | 97.041                               | 1574.61                             | 4.95    | 0.17870                              | 20.23   | -0.9993                 | Model 1       | 1.1  | 3.47               | 0.13                  |
|           | 2         | 0.608 | 0.0006 | 90.056                               | 1560.13                             | 4.12    | 0.17918                              | 16.76   | -0.9993                 |               |      |                    |                       |
|           | 3         | 0.644 | 0.0006 | 93.472                               | 1624.96                             | 5.48    | 0.14865                              | 28.02   | -0.9996                 |               |      |                    |                       |
|           | 4         | 0.579 | 0.0007 | 57.497                               | 1440.01                             | 4.73    | 0.22722                              | 14.19   | -0.9994                 |               |      |                    |                       |
|           | 5         | 0.361 | 0.0005 | 51.243                               | 1329.49                             | 6.17    | 0.26728                              | 14.80   | -0.9997                 |               |      |                    |                       |
| 370-3     | 1         | 0.499 | 0.0037 | 24.264                               | 396.26                              | 0.92    | 0.65844                              | 0.36    | -0.9711                 | Model 2       | 12   | 3.62               | 0.14                  |
|           | 2         | 0.640 | 0.0086 | 21.711                               | 230.21                              | 0.49    | 0.72893                              | 0.15    | -0.8175                 |               |      |                    |                       |
|           | 3         | 0.435 | 0.0036 | 23.605                               | 360.79                              | 1.07    | 0.67145                              | 0.39    | -0.9864                 |               |      |                    |                       |
|           | 4         | 0.627 | 0.0021 | 32.272                               | 728.65                              | 2.18    | 0.51657                              | 1.66    | -0.9983                 |               |      |                    |                       |
|           | 5         | 0.427 | 0.0049 | 21.053                               | 265.99                              | 0.89    | 0.71513                              | 0.30    | -0.8012                 |               |      |                    |                       |
|           | 6         | 0.681 | 0.0033 | 26.796                               | 553.68                              | 1.29    | 0.59403                              | 0.57    | -0.9900                 |               |      |                    |                       |
| 370-1     | 1         | 0.815 | 0.0047 | 25.285                               | 487.63                              | 1.05    | 0.62749                              | 0.47    | -0.9900                 | Model 1       | 9    | 3.63               | 0.17                  |
|           | 2         | 0.777 | 0.0087 | 20.416                               | 273.01                              | 0.59    | 0.71665                              | 1.00    | -0.9900                 |               |      |                    |                       |
|           | 3         | 0.890 | 0.0152 | 23.681                               | 186.21                              | 2.00    | 0.75883                              | 1.18    | -0.0256                 |               |      |                    |                       |
| 370-5     | 1         | 0.923 | 0.0026 | 33.492                               | 830.04                              | 3.90    | 0.46695                              | 3.84    | -0.9407                 | Model 1       | 0.87 | 3.76               | 0.12                  |
|           | 2         | 0.930 | 0.0013 | 27.874                               | 1297.16                             | 4.94    | 0.25525                              | 12.66   | -0.9932                 |               |      |                    |                       |
|           | 3         | 0.945 | 0.0027 | 14.500                               | 834.68                              | 5.15    | 0.46107                              | 5.00    | -0.9963                 |               |      |                    |                       |
|           | 4         | 0.943 | 0.0009 | 34.045                               | 1548.26                             | 7.94    | 0.14079                              | 43.34   | -0.9958                 |               |      |                    |                       |
|           | 5         | 0.910 | 0.0013 | 28.129                               | 1319.67                             | 8.75    | 0.24901                              | 23.19   | -0.9999                 |               |      |                    |                       |
| 645-13    | 1         | 1.378 | 0.0011 | 188.181                              | 1455.77                             | 1.55    | 0.11368                              | 10.77   | -0.9962                 | Model 1       | 1.8  | 4.14               | 0.11                  |
|           | 2         | 1.413 | 0.0009 | 326.580                              | 1561.70                             | 1.26    | 0.06547                              | 16.03   | -0.9905                 |               |      |                    |                       |
|           | 3         | 1.444 | 0.0013 | 149.191                              | 1399.94                             | 1.32    | 0.14249                              | 7.05    | -0.9889                 |               |      |                    |                       |
|           | 4         | 1.444 | 0.0011 | 216.937                              | 1528.48                             | 3.11    | 0.08050                              | 31.95   | -0.9963                 |               |      |                    |                       |
| 370-11    | 1         | 2.232 | 0.0016 | 443.252                              | 1474.23                             | 1.15    | 0.08229                              | 11.50   | -0.9722                 | Model 1       | 0.65 | 4.15               | 0.12                  |
|           | 2         | 2.213 | 0.0018 | 157.545                              | 1401.42                             | 0.79    | 0.10821                              | 5.62    | -0.9632                 |               |      |                    |                       |
|           | 3         | 2.247 | 0.0015 | 58.606                               | 1536.02                             | 1.04    | 0.06605                              | 13.13   | -0.9872                 |               |      |                    |                       |
|           | 4         | 2.233 | 0.0017 | 232.751                              | 1446.45                             | 1.13    | 0.10250                              | 8.72    | -0.9515                 |               |      |                    |                       |
|           | 5         | 2.575 | 0.0016 | 487.537                              | 1563.23                             | 0.93    | 0.05727                              | 13.78   | -0.9934                 |               |      |                    |                       |
|           | 6         | 2.651 | 0.0021 | 154.360                              | 1435.06                             | 1.78    | 0.09496                              | 15.21   | -0.9977                 |               |      |                    |                       |
| 2200-12-4 | 1         | 1.264 | 0.0040 | 33.669                               | 732.52                              | 1.49    | 0.46672                              | 1.42    | -0.9994                 | Model 2       | 12   | 4.16               | 0.12                  |
|           | 2         | 1.161 | 0.0039 | 33.516                               | 699.77                              | 1.49    | 0.47931                              | 1.34    | -0.9990                 |               |      |                    |                       |
|           | 3         | 1.107 | 0.0025 | 35.874                               | 898.33                              | 2.05    | 0.38734                              | 2.75    | -0.9996                 |               |      |                    |                       |
|           | 4         | 1.185 | 0.0041 | 31.877                               | 692.44                              | 2.21    | 0.48329                              | 1.95    | -0.9997                 |               |      |                    |                       |
|           | 5         | 1.236 | 0.0078 | 25.580                               | 441.36                              | 1.65    | 0.61137                              | 0.81    | -0.9977                 |               |      |                    |                       |
|           | 6         | 1.159 | 0.0428 | 20.193                               | 88.57                               | 0.23    | 0.78183                              | 0.10    | -0.6037                 |               |      |                    |                       |

|        |   |       |        |         |         |       |         |       |         |         |       |      |      |
|--------|---|-------|--------|---------|---------|-------|---------|-------|---------|---------|-------|------|------|
| 2200-2 | 1 | 1.251 | 0.0037 | 41.316  | 779.41  | 1.65  | 0.47306 | 1.73  | -0.7433 | Model 2 | 6     | 4.20 | 0.14 |
|        | 2 | 1.189 | 0.0012 | 111.950 | 1372.26 | 4.02  | 0.15846 | 19.04 | -0.9947 |         |       |      |      |
|        | 3 | 1.180 | 0.0017 | 30.526  | 1183.42 | 3.17  | 0.25332 | 8.20  | -0.9992 |         |       |      |      |
|        | 4 | 1.294 | 0.0020 | 58.025  | 1130.91 | 2.22  | 0.28262 | 4.93  | -0.9674 |         |       |      |      |
| 483-9  | 1 | 0.208 | 0.0012 | 28.839  | 447.93  | 3.10  | 0.55287 | 2.00  | -0.9966 | Model 1 | 2.3   | 4.89 | 0.12 |
|        | 2 | 0.184 | 0.0021 | 24.352  | 256.55  | 1.81  | 0.66543 | 0.67  | -0.9738 |         |       |      |      |
|        | 3 | 0.217 | 0.0004 | 49.213  | 990.42  | 5.83  | 0.25240 | 15.15 | -0.9990 |         |       |      |      |
|        | 4 | 0.217 | 0.0005 | 46.111  | 866.50  | 7.51  | 0.31584 | 14.11 | -0.9996 |         |       |      |      |
|        | 5 | 0.207 | 0.0003 | 94.751  | 1233.68 | 10.90 | 0.10903 | 80.00 | -0.9960 |         |       |      |      |
| 370-16 | 1 | 0.494 | 0.0006 | 129.862 | 1160.43 | 3.43  | 0.14086 | 18.69 | -0.9995 | Model 2 | 25    | 4.97 | 0.12 |
|        | 2 | 0.446 | 0.0004 | 159.337 | 1248.65 | 6.13  | 0.08517 | 59.29 | -0.9996 |         |       |      |      |
|        | 3 | 0.468 | 0.0005 | 211.050 | 1234.01 | 5.03  | 0.09162 | 44.85 | -0.9973 |         |       |      |      |
|        | 4 | 0.477 | 0.0012 | 46.703  | 792.67  | 2.66  | 0.34461 | 4.35  | -0.9950 |         |       |      |      |
|        | 5 | 0.385 | 0.0012 | 42.631  | 680.70  | 1.93  | 0.41639 | 2.33  | -0.9498 |         |       |      |      |
|        | 6 | 0.404 | 0.0021 | 29.680  | 489.96  | 1.42  | 0.53473 | 1.00  | -0.9979 |         |       |      |      |
|        | 7 | 0.376 | 0.0016 | 34.344  | 567.01  | 1.50  | 0.48040 | 1.33  | -0.9973 |         |       |      |      |
| 370-17 | 1 | 1.832 | 0.0354 | 22.212  | 158.78  | 0.15  | 0.71576 | 0.11  | -0.8208 | Model 2 | 2.7   | 5.34 | 0.12 |
|        | 2 | 1.657 | 0.0317 | 22.309  | 159.78  | 0.14  | 0.71395 | 0.10  | -0.8377 |         |       |      |      |
|        | 3 | 1.087 | 0.0200 | 22.454  | 165.88  | 0.22  | 0.71054 | 0.11  | -0.8202 |         |       |      |      |
|        | 4 | 0.423 | 0.0019 | 33.262  | 523.67  | 1.91  | 0.48798 | 1.65  | -0.9994 |         |       |      |      |
|        | 5 | 3.090 | 0.0509 | 22.800  | 183.14  | 0.18  | 0.70022 | 0.11  | -0.8373 |         |       |      |      |
| 370-19 | 1 | 2.063 | 0.0390 | 22.285  | 162.23  | 0.21  | 0.71538 | 0.11  | -0.7858 | Model 1 | 0.017 | 5.59 | 0.15 |
|        | 2 | 2.050 | 0.0309 | 23.151  | 198.44  | 0.20  | 0.69156 | 0.11  | -0.7885 |         |       |      |      |
|        | 3 | 1.832 | 0.0333 | 22.422  | 167.97  | 0.22  | 0.71167 | 0.11  | -0.5780 |         |       |      |      |
|        | 4 | 1.591 | 0.0337 | 21.866  | 146.12  | 0.29  | 0.72609 | 0.12  | -0.7900 |         |       |      |      |
|        | 5 | 2.227 | 0.0363 | 22.844  | 185.14  | 0.19  | 0.70030 | 0.11  | -0.8151 |         |       |      |      |

877

878

879

## SUPPLEMENTARY REFERENCES

880

881

882

883

884

885

886

887

888

889

890

891

892

893

894

895

896

1. Carrion JS & Scott L (1999) The challenge of pollen analysis in palaeoenvironmental studies of hominid beds: the record from Sterkfontein caves. *Journal of Human Evolution* 36(4):401-408.
2. Munsterman D & Kerstholt S (1996) Sodium polytungstate, a new non-toxic alternative to bromoform in heavy liquid separation. *Review of Palaeobotany and Palynology* 91:417-422.
3. Maher LJ (1972) Nomograms for computing 0.95 confidence limits of pollen data. *Review of Palaeobotany and Palynology* 13:85-93.
4. Mosimann JE (1965) Statistical methods for the pollen analyst: multinomial and negative multinomial techniques. *Handbook of Paleontological Techniques*, eds Kummel B & Raup D (Freeman, San Francisco, California), pp 636-673.
5. Mast AR & Givnish TJ (2002) Historical biogeography and the origin of stomatal distributions in *Banksia* and *Dryandra* (Proteaceae) based on their cpDNA phylogeny. *American Journal of Botany* 89(8):1311-1323.
6. He TH, Lamont BB, & Downes KS (2011) *Banksia* born to burn. *New Phytologist* 191(1):184-196.

- 897 7. Cardillo M & Pratt R (2013) Evolution of a hotspot genus: geographic variation in  
898 speciation and extinction rates in *Banksia* (Proteaceae). *BMC Evolutionary Biology*  
899 13:155.
- 900 8. Punt W, Hoen PP, Blackmore S, Nilsson S, & Le Thomas A (2007) Glossary of  
901 pollen and spore terminology. *Review of Palaeobotany and Palynology* 143:1-81.
- 902 9. Coles GM & Gilbertson DD (1994) The airfall-pollen budget of archaeologically  
903 important caves: Creswell Crags, England. *Journal of Archaeological Science*  
904 21:735-755.
- 905 10. Burney DA & Burney LP (1993) Modern Pollen Deposition in Cave Sites -  
906 Experimental Results from New-York-State. *New Phytologist* 124(3):523-535.
- 907 11. McGarry SF & Caseldine C (2004) Speleothem palynology: an undervalued tool in  
908 Quaternary studies. *Quaternary Science Reviews* 23(23-24):2389-2404.
- 909 12. Bastin B (1978) L'analyse pollinique des stalagmites: Une nouvelle possibilité  
910 d'approche des fluctuations climatiques du Quaternaire. *Annales de la Société*  
911 *Géologique de Belgique* 101:13-19.
- 912 13. Navarro C, Carrion JS, Munuera M, & Prieto AR (2001) Cave surface pollen and the  
913 palynological potential of karstic cave sediments in palaeoecology. *Review of*  
914 *Palaeobotany and Palynology* 117(4):245-265.
- 915 14. Hunt CO & Rushworth G (2005) Pollen taphonomy and airfall sedimentation in a  
916 tropical cave: the west mouth of the great cave of Niah in Sarawak, Malaysian  
917 Borneo. *Journal of Archaeological Science* 32(3):465-473.
- 918 15. Webb JA & James JM (2006) Karst evolution of the Nullarbor Plain, Australia.  
919 *Geological Society of America Special Paper* 404:65-78.
- 920 16. Newstrom L & Robertson A (2005) Progress in understanding pollination systems in  
921 New Zealand. *New Zealand Journal of Botany* 43:1-59.
- 922 17. Pagani M, Arthur MA, & Freeman KH (1999) Miocene evolution of atmospheric  
923 carbon dioxide. *Paleoceanography* 14:273-292.
- 924 18. Macphail MK (1997) Late Neogene climates in Australia: fossil pollen- and spore-  
925 based estimates in retrospect and prospect. *Australian Journal of Botany* 45:425-464.
- 926 19. Murton JB, *et al.* (2001) A late Middle Pleistocene temperate-periglacial-temperate  
927 sequence (Oxygen Isotope Stages 7-5e) near Marsworth, Buckinghamshire, UK.  
928 *Quaternary Science Reviews* 20(18):1787-1825.
- 929 20. Traverse A (2007) *Paleopalynology* (Springer, Dordrecht, Netherlands) 2nd Ed.
- 930 21. Salzmann U, Haywood AM, Lunt DJ, Valdes PJ, & Hill DJ (2008) A new global  
931 biome reconstruction and data-model comparison for the Middle Pliocene. *Global*  
932 *Ecology and Biogeography* 17(3):432-447.
- 933 22. McGlone MS (2001) A late Quaternary pollen record from marine core P69,  
934 southeastern North Island, New Zealand. *New Zealand Journal of Geology &*  
935 *Geophysics* 44:69-77.
- 936 23. Beadle N (1981) *The Vegetation of Australia* (Cambridge University Press, New  
937 York).
- 938 24. Hills RR, Sandiford M, Reynolds SD, & Quigley MC (2008) Present-day stresses,  
939 seismicity and Neogene-to-Recent tectonics of Australia's 'passive' margins:  
940 intraplate deformation controlled by plate boundary forces. *Geological Society of*  
941 *London, Special Publications* 306:71-90.
- 942 25. Sinka KJ & Atkinson TC (1999) A mutual climatic range method for reconstructing  
943 palaeoclimate from plant remains. *Journal of the Geological Society* 156:381-396.
- 944 26. Mosbrugger V & Utescher T (1997) The coexistence approach- a method for  
945 quantitative reconstructions of Tertiary terrestrial palaeoclimate data using plant  
946 fossils. *Palaeogeography, Palaeoclimatology, Palaeoecology* 134:61-86.



- 947 27. Sniderman JMK, Porch N, & Kershaw AP (2009) Quantitative reconstruction of  
948 Early Pleistocene climate in southeastern Australia and implications for atmospheric  
949 circulation. *Quaternary Science Reviews* 28:3185-3196.
- 950 28. Porch N (2010) Climate space, bioclimatic envelopes and coexistence methods for  
951 the reconstruction of past climates: a method using Australian beetles and  
952 significance for Quaternary reconstruction. *Quaternary Science Reviews* 29(5-6):633-  
953 647.
- 954 29. DPaW (2007-) *NatureMap: Mapping Western Australia's Biodiversity* (Department  
955 of Parks and Wildlife).
- 956 30. Elith J & Leathwick JR (2009) Species distribution models: ecological explanation  
957 and prediction across space and time. *Annual Review of Ecology, Evolution, and*  
958 *Systematics* 40(1):677-697.
- 959 31. Franklin J (2010) *Mapping Species Distributions: Spatial Inference and Prediction*  
960 (Cambridge University Press, Cambridge) p 336.
- 961 32. Ward GT, Hastie T, Barry S, Elith J, & Leathwick J (2009) Presence-only data and  
962 the EM algorithm. *Biometrics* 65:554-563.
- 963 33. Elith J, *et al.* (2006) Novel methods improve prediction of species' distributions from  
964 occurrence data. *Ecography* 29(2):129-151.
- 965 34. Phillips S & Elith J (2013) On estimating probability of presence from use-  
966 availability or presence-background data. *Ecology* 94:1409-1419.
- 967 35. Fithian W, Elith J, Hastie T, & Keith DA (2014) Bias correction in species  
968 distribution models: pooling survey and collection data for multiple species. *Methods*  
969 *in Ecology and Evolution* 6:424-438.
- 970 36. Gu WD & Swihart RK (2004) Absent or undetected? Effects of non-detection of  
971 species occurrence on wildlife-habitat models. *Biological Conservation* 116:195-  
972 203.
- 973 37. Chen L-Y, *et al.* (2014) Historical biogeography of Haloragaceae: An out-of-  
974 Australia hypothesis with multiple intercontinental dispersals. *Molecular*  
975 *Phylogenetics and Evolution* 78(0):87-95.
- 976 38. Price J, *et al.* (2012) *Mapping Plant Species Ranges in the Hawaiian Islands—*  
977 *Developing a Methodology and Associated GIS Layers* p 34.
- 978 39. Stevens PF (2001-) *Angiosperm Phylogeny Website. Version 12, July 2012 [and*  
979 *more or less continuously updated since]*.
- 980 40. Wood S (2012) *mgcv : Mixed GAM Computation Vehicle with GCV/AIC/REML*  
981 *smoothness estimation*.
- 982 41. Team RDC (2003) *R: A language and environment for statistical computing*  
983 (Foundation for Statistical Computing, Vienna, Austria).
- 984 42. Xu T & Hutchinson M (2011) *ANUCLIM Version 6.1* (ANU Fenner School of  
985 Environment and Society, Canberra).
- 986 43. D'Costa D & Kershaw AP (1997) An expanded Recent pollen database from south-  
987 eastern Australia and its potential for refinement of palaeoclimatic estimates.  
988 *Australian Journal of Botany* 45:583-605.
- 989 44. Newsome JC (1999) Pollen-vegetation relationships in semi-arid southwestern  
990 Australia. *Review of Palaeobotany and Palynology* 106(1-2):103-119.
- 991 45. Martin HA (1973) Palynology and historical ecology of some cave excavations in the  
992 Australian Nullarbor. *Australian Journal of Botany* 21:283-316.
- 993 46. Woodhead J, *et al.* (2006) U-Pb geochronology of speleothems by MC-ICPMS.  
994 *Quaternary Geochronology* 1(3):208-221.
- 995 47. Woodhead J, *et al.* (2010) Speleothem climate records from deep time? Exploring the  
996 potential with an example from the Permian. *Geology* 38:455-458.

- 997 48. Paton C, Hellstrom J, Paul B, Woodhead J, & Hergt J (2011) Iolite: Freeware for the  
998 visualisation and processing of mass spectrometric data. *Journal of Analytical Atomic*  
999 *Spectrometry*:2508-2518.
- 1000 49. Schmitz MD & Schoene B (2007) Derivation of isotope ratios, errors, and error  
1001 correlations for U-Pb geochronology using <sup>205</sup>Pb-<sup>235</sup>U-(<sup>233</sup>U)-spiked isotope  
1002 dilution thermal ionization mass spectrometric data. *Geochemistry, Geophysics,*  
1003 *Geosystems* 8(8):Q08006.
- 1004 50. Ludwig KR (2001) Isoplot/Ex, rev. 2.49. A Geochronological Toolkit for Microsoft  
1005 Excel. *Berkeley Geochronology Center Special Publication 1a*.
- 1006 51. Powell R, Hergt J, & Woodhead J (2002) Improving isochron calculations with  
1007 robust statistics and the bootstrap. *Chemical Geology* 185:191-204.
- 1008 52. Jaffey AH, Flynn KF, Glendenin LE, Bentley WC, & Essling AM (1971) Precision  
1009 measurement of half-lives and specific activities of <sup>235</sup>U and <sup>238</sup>U. *Physical Review*  
1010 C4:1889-1906.
- 1011 53. Cheng H, *et al.* (2013) Improvements in <sup>230</sup>Th dating, <sup>230</sup>Th and <sup>234</sup>U half-life  
1012 values, and U–Th isotopic measurements by multi-collector inductively coupled  
1013 plasma mass spectrometry. *Earth and Planetary Science Letters* 371–372:82-91.
- 1014 54. Prideaux GJ, *et al.* (2007) An arid-adapted middle Pleistocene vertebrate fauna from  
1015 south-central Australia. *Nature* 445(7126):422-425.
- 1016 55. Garreta V, Guiot J, Mortier F, Chadoeuf J, & Hély C (2012) Pollen-based climate  
1017 reconstruction: calibration of the vegetation–pollen processes. *Ecological Modelling*  
1018 235-236:81-94.
- 1019 56. Martin TG, *et al.* (2005) Zero tolerance ecology: improving ecological inference by  
1020 modelling the source of zero observations. *Ecology Letters* 8(11):1235-1246.
- 1021 57. Chen J & Gupta AK (2000) *Parametric Statistical Change Point Analysis*  
1022 (Birkhauser, New York).
- 1023 58. Killick R, Eckley I, Haynes K, & Fearnhead P (2014) *An R package for changepoint*  
1024 *analysis*.
- 1025 59. Killick R, Fearnhead P, & Eckley IA (2012) Optimal detection of changepoints with  
1026 a linear computational cost. *Journal of the American Statistical Association*  
1027 107:1590-1598.
- 1028 60. Zachos JC, Dickens GR, & Zeebe RE (2008) An early Cenozoic perspective on  
1029 greenhouse warming and carbon-cycle dynamics. *Nature* 451(7176):279-283.
- 1030 61. Ogg JG (2012) Chapter 5 - Geomagnetic Polarity Time Scale. *The Geologic Time*  
1031 *Scale*, eds Gradstein FM, Ogg JG, Schmitz MD, & Ogg GM (Elsevier, Boston), pp  
1032 85-113.
- 1033 62. Salzmann U, *et al.* (2013) Challenges in quantifying Pliocene terrestrial warming  
1034 revealed by data-model discord. *Nature Climate Change* 3(11):969-974.
- 1035 63. Stover LE & Partridge AD (1973) Tertiary and Late Cretaceous spores and pollen  
1036 from the Gippsland Basin, south-eastern Australia. *Proceedings of the Royal Society*  
1037 *of Victoria* 85:237-286.
- 1038 64. Partridge AD (2006) Late Cretaceous–Cenozoic palynology zonations Gippsland  
1039 Basin. *Australian Mesozoic and Cenozoic Palynology Zonations – Updated to the*  
1040 *2004 Geologic Time Scale*, ed Monteil E (Geoscience Australia Record 2006/23).
- 1041 65. Macphail MK & Truswell EM (1993) Palynostratigraphy of the Bookpurnong Beds  
1042 and related late Miocene-early Pliocene facies in the central West Murray Basin; Part  
1043 2, Spores and pollens. *AGSO Journal of Australian Geology and Geophysics*  
1044 14(4):383-409.
- 1045 66. Macphail MK (1999) Palynostratigraphy of the Murray Basin, inland southeastern  
1046 Australia. *Palynology* 23:197-240.
- 1047 67. McMinn A (1992) Pliocene through Holocene dinoflagellate cyst biostratigraphy of  
1048 the Gippsland Basin, Australia. *Neogene and Quaternary Dinoflagellate Cysts and*

- 1049 *Acritarchs*, eds Head MJ & Wrenn JH (American Association of Stratigraphic  
1050 Palynologists Foundation, Dallas), pp 147-161.
- 1051 68. Anthonissen DE & Ogg JG (2012) Appendix 3 - Cenozoic and Cretaceous  
1052 Biochronology of Planktonic Foraminifera and Calcareous Nannofossils. *The*  
1053 *Geologic Time Scale*, eds Gradstein FM, Schmitz JGOD, & Ogg GM (Elsevier,  
1054 Boston), pp 1083-1127.
- 1055 69. Wade BS, Pearson PN, Berggren WA, & Pälike H (2011) Review and revision of  
1056 Cenozoic tropical planktonic foraminiferal biostratigraphy and calibration to the  
1057 geomagnetic polarity and astronomical time scale. *Earth-Science Reviews* 104(1–  
1058 3):111-142.
- 1059 70. Gallagher SJ, *et al.* (2003) The Pliocene climatic and environmental evolution of  
1060 southeastern Australia: evidence from the marine and terrestrial realm.  
1061 *Palaeogeography Palaeoclimatology Palaeoecology* 193(3-4):349-382.
- 1062 71. Sniderman JMK (2011) Early Pleistocene vegetation change in upland south-eastern  
1063 Australia. *Journal of Biogeography* 38:1456-1470.
- 1064 72. Cookson IC (1950) Fossil pollen grains of Proteaceous type from Tertiary deposits in  
1065 Australia. *Australian Journal of Science* 3:166-177.
- 1066 73. Baum DA, Alverson WS, & Nyffeler R (1998) A durian by any other name:  
1067 taxonomy and nomenclature of the core Malvales. *Harvard Papers in Botany* 3:315-  
1068 330.
- 1069 74. Macphail M (1973) Pollen analysis of a buried organic deposit on the backshore at  
1070 Fingal Bay, Port Stephens, New South Wales. *Proceedings of the Linnean Society of*  
1071 *New South Wales* 98:222-233.
- 1072 75. Hooley AD, Southern W, & Kershaw AP (1980) Holocene vegetation and  
1073 environments of Sperm Whale Head, Victoria, Australia. *Journal of Biogeography*  
1074 7(4):349-362.
- 1075 76. Reitsma T (1969) Size modification of recent pollen grains under different  
1076 treatments. *Review of Palaeobotany and Palynology* 9:175-202.
- 1077 77. Sauquet H, *et al.* (2012) Testing the Impact of Calibration on Molecular Divergence  
1078 Times Using a Fossil-Rich Group: The Case of Nothofagus (Fagales). *Systematic*  
1079 *Biology* 61(2):289-313.
- 1080 78. Selling OH (1947) *Studies in Hawaiian Pollen Statistics. Part II. The Pollens of the*  
1081 *Hawaiian Phanerogams* (Bishop Museum, Honolulu, Hawaii).
- 1082 79. Punt W & Leenhouts PW (1967) Pollen morphology and taxonomy in the  
1083 Loganiaceae. *Grana Palynologica* 7:469-516.
- 1084 80. Moar NT (1993) *Pollen Grains of New Zealand Dicotyledonous Plants* (Maanaki  
1085 Whenua Press, Lincoln) p 200.
- 1086 81. Gibbons KL, Henwood MJ, & Conn BJ (2012) Phylogenetic relationships in  
1087 Loganieae (Loganiaceae) inferred from nuclear ribosomal and chloroplast DNA  
1088 sequence data. *Australian Systematic Botany* 25:331-340.
- 1089 82. Foster CSP, Ho SYW, Conn BJ, & Henwood MJ (2014) Molecular systematics and  
1090 biogeography of *Logania* R.Br. (Loganiaceae). *Molecular Phylogenetics and*  
1091 *Evolution* 78(0):324-333.
- 1092 83. Foster C, Conn BJ, Henwood MJ, & Ho S (2014) Molecular data support *Orianthera*:  
1093 a new genus of Australian Loganiaceae. *Telopea* 16:149-158.
- 1094 84. Moar NT, Wilmshurst JM, & McGlone MS (2011) Standardizing names applied to  
1095 pollen and spores in New Zealand Quaternary palynology. *New Zealand Journal of*  
1096 *Botany* 49:201-229.
- 1097 85. Conn BJ (1980) A taxonomic revision of *Geniostoma* subg. *Geniostoma*  
1098 (Loganiaceae). *Blumea* 26:245-364.

- 1099 86. Moles AT & Drake DR (1999) Potential contributions of the seed rain and seed bank  
1100 to regeneration of native forest under plantation pine in New Zealand. *New Zealand*  
1101 *Journal of Botany* 37:83-93.
- 1102 87. Allan HH (1982) *Flora of New Zealand* (Government Printer, Wellington) p 1085.
- 1103 88. Heusser CJ (1964) Palynology of four bog sections from the western Olympic  
1104 Peninsula, Washington. *Ecology* 45:23-40.
- 1105 89. Moravek S, Luly J, Grindrod J, & Fairfax R (2013) The origin of grassy balds in the  
1106 Bunya Mountains, southeastern Queensland, Australia. *The Holocene* 23(2):305-315.
- 1107 90. Furness CA & Rudall PJ (2001) Pollen and anther characters in monocot systematics.  
1108 *Grana* 40:17-25.
- 1109 91. Chase MW, *et al.* (2000) Higher-level systematics of the monocotyledons: an  
1110 assessment of current knowledge and a new classification. *Monocots: Systematics*  
1111 *and Evolution*, eds Wilson KL & Morrison DA (CSIRO, Melbourne), pp 3-16.
- 1112 92. Chase MW, *et al.* (2006) Multigene analysis of monocot relationships: a summary.  
1113 *Aliso* 22:63-75.
- 1114 93. Goldblatt P, *et al.* (2008) Iridaceae 'out of Australasia'? Phylogeny, biogeography,  
1115 and divergence time based on plastid DNA sequences. *Systematic Botany* 33(3):495-  
1116 508.
- 1117 94. Schulze W (1971) Beiträge zur Pollenmorphologie der Iridaceae und ihre Bedeutung  
1118 für die Taxonomie. *Feddes Repertorium* 82:101-124.
- 1119 95. Goldblatt P & Manning JC (1989) Pollen Morphology of the Shrubby Iridaceae  
1120 *Nivenia, Klattia, and Witsenia*. *Annals of the Missouri Botanical Garden* 76:1103-  
1121 1108.
- 1122 96. Goldblatt P & Le Thomas A (1992) Pollen apertures, exine sculpturing and  
1123 phylogeny in Iridaceae subfamily Iridoideae. *Review of Palaeobotany and*  
1124 *Palynology* 75:301-315.
- 1125 97. Furness CA & Rudall PJ (1999) Inaperturate pollen in monocotyledons. *International*  
1126 *Journal of Plant Science* 160:395-414.
- 1127 98. Goldblatt P, Manning JC, & Bari A (1991) Sulcus and operculum structure in the  
1128 pollen grains of Iridaceae subfamily Ixoideae. *Annals of the Missouri Botanical*  
1129 *Garden* 78:950-961.
- 1130 99. Furness CA, Conran JG, Gregory T, & Rudall PJ (2014) The trichotomosulcate  
1131 asparagoids: pollen morphology of Hemerocallidaceae in relation to systematics and  
1132 pollination biology. *Australian Systematic Botany* 26:393-407.
- 1133 100. Kosenko V (1999) Pollen morphology in the family Asphodelaceae (Asphodeleae,  
1134 Kniphofieae). *Grana* 38:218-227.
- 1135 101. Clifford HT & Conran JG (1998) Blandfordiaceae. *Flowering Plants –*  
1136 *Monocotyledons*, ed Kubitzki K (Springer-Verlag, Heidelberg), pp 148-150.
- 1137 102. Erdtman G (1971) *Pollen Morphology and Plant Taxonomy – Angiosperms* (Hafner,  
1138 New York) p 553.
- 1139 103. Chen SC, Zhang XP, Ni SF, Fu CX, & Cameron KM (2006) The systematic value of  
1140 pollen morphology in Smilacaceae. *Plant Systematics and Evolution* 259:19-37.
- 1141 104. Simpson MG (1983) Pollen ultrastructure of the Haemodoraceae and its taxonomic  
1142 significance. *Grana* 22:79-103.
- 1143 105. Pierce NB & Simpson MG (2009) Polyaperturate pollen types and ratios of  
1144 heteromorphism in the monocot genus *Conostylis* (Haemodoraceae). *Australian*  
1145 *Systematic Botany* 22(1):16-30.
- 1146 106. Simpson MG (1985) Pollen ultrastructure of the Philydraceae. *Grana* 24:23-31.
- 1147 107. Barrett CF, Davis JI, Leebens-Mack J, Conran JG, & Stevenson DW (2013) Plastid  
1148 genomes and deep relationships among the commelinid monocot angiosperms.  
1149 *Cladistics* 29(1):65-87.

- 1150 108. Chanda S & Ghosh K (1976) Pollen morphology and its evolutionary significance in  
1151 Xanthorrhoeaceae. *The Evolutionary Significance of the Exine*, eds Ferguson IK &  
1152 Muller J (Academic Press, London), pp 527-559.
- 1153 109. Halbritter H & Hesse M (1995) The convergent evolution of exine shields in  
1154 angiosperm pollen. *Grana* 34:108-119.
- 1155 110. Harden G (1993) *Flora of New South Wales* (NSW University Press, Kensington,  
1156 NSW) p 775.
- 1157 111. Schneider U, *et al.* (2011) GPCC Full Data Reanalysis Version 6.0 at 0.5°: Monthly  
1158 Land-Surface Precipitation from Rain-Gauges built on GTS-based and Historic  
1159 Data).
- 1160 112. van Oldenborgh GJ, *et al.* (2009) Western Europe is warming much faster than  
1161 expected. *Climate of the Past* 5:1-12.
- 1162 113. Martin HA (1973) The palynology of some Tertiary and Pleistocene deposits,  
1163 Lachlan River Valley, New South Wales. *Australian Journal of Botany*  
1164 Supplementary series 6:1-57.
- 1165 114. McMinn A (1992) Neogene dinoflagellate distribution in the eastern Indian Ocean  
1166 from Leg 123, Site 765. *Proceedings of Ocean Drilling Program Scientific Results*  
1167 123:429-441.
- 1168 115. Khan AA (1974) Palynology of Neogene sediments from Papua (New Guinea)  
1169 stratigraphic boundaries. *Pollen et Spores* 16:265-284.
- 1170 116. Gibbard PL, Head MJ, & Walker MJC (2010) Formal ratification of the Quaternary  
1171 System/Period and the Pleistocene Series/Epoch with a base at 2.58 Ma. *Journal of*  
1172 *Quaternary Science* 25(2):96-102.
- 1173 117. Rossouw L & Scott L (2011) Phytoliths and pollen, the microscopic plant remains in  
1174 Pliocene volcanic sediments around Laetoli, Tanzania. *Paleontology and Geology of*  
1175 *Laetoli: Human Evolution in Context. Volume 1: Geology, Geochronology,*  
1176 *Paleoecology and Paleoenvironment.*, ed Harrison T (Springer, Dordrecht), Vol 1, pp  
1177 201-215.
- 1178 118. Martin HA & McMinn A (1994) Late Cainozoic vegetation history of north-western  
1179 Australia, from the palynology of a deep sea core (ODP Site 765). *Australian Journal*  
1180 *of Botany* 42:95-102.
- 1181 119. Martin HA (1990) The palynology of the Namba Formation in Wooltana-1 bore,  
1182 Callabona Basin (Lake Frome), South Australia and its relevance to Miocene  
1183 grasslands in central Australia. *Alcheringa* 14:247-255.
- 1184 120. Callen RA, Alley NF, & Greenwood DR (1995) Lake Eyre Basin. *South Australian*  
1185 *Geological Survey Bulletin* 54:188-194.
- 1186 121. Truswell EM & Harris WK (1982) The Cainozoic palaeobotanical record in arid  
1187 Australia: fossil evidence for the origins of an arid adapted flora. *Evolution of the*  
1188 *Flora and Fauna of Arid Australia*, eds Barker WR & Greenslade PJM (Peacock,  
1189 Adelaide), pp 67-76.
- 1190 122. Martin HA & McMinn A (1993) Palynology of sites 815 and 823: the Neogene  
1191 vegetation history of coastal northeastern Australia. *Proceedings of Ocean Drilling*  
1192 *Program Scientific Results* 133:115-123.
- 1193 123. Kershaw AP & Sluiter IRK (1982) Late Cenozoic pollen spectra from the Atherton  
1194 Tableland, north-eastern Australia. *Australian Journal of Botany* 30:279-295.
- 1195 124. Dodson JR & Macphail MK (2004) Palynological evidence for aridity events and  
1196 vegetation change during the Middle Pliocene, a warm period in southwestern  
1197 Australia. *Global and Planetary Change* 41:285-307.
- 1198 125. Dodson JR & Ramrath A (2001) An Upper Pliocene lacustrine environmental record  
1199 from south-Western Australia- preliminary results. *Palaeogeography,*  
1200 *Palaeoclimatology, Palaeoecology* 167:309-320.

- 1201 126. Bint AN (1981) An early Pliocene pollen assemblage from Lake Tay, southwestern  
1202 Australia, and its phytogeographic implications. *Australian Journal of Botany*  
1203 29:277-291.
- 1204 127. Martin HA (1991) Tertiary stratigraphic palynology and palaeoclimate of the inland  
1205 river systems in New South Wales. *The Cainozoic of Australia: a Re-appraisal of the*  
1206 *Evidence*, Special Publication of the Geological Society of Australia, eds Williams  
1207 MAJ, De Deckker P, & Kershaw AP), Vol 18, pp 181-194.
- 1208 128. Kershaw AP, Martin HA, & McEwan Mason JRC (1994) The Neogene: a period of  
1209 transition. *History of the Australian Vegetation: Cretaceous to Recent*, ed Hill RS  
1210 (Cambridge University Press, Cambridge), pp 299-327.
- 1211 129. Macphail MK, Colhoun EA, & Fitzsimons SJ (1995) Key periods in the evolution of  
1212 the Cenozoic vegetation and flora in western Tasmania: the Late Pliocene. *Australian*  
1213 *Journal of Botany* 43:505-526.
- 1214 130. Martin HA (1979) Stratigraphic palynology of the Mooki Valley, New South Wales.  
1215 *Journal and Proceedings of the Royal Society of New South Wales* 112:71-78.
- 1216 131. Martin HA (1980) Stratigraphic palynology from shallow bores in the Namoi River  
1217 and Gwydir River valleys, North-central New South Wales. *Journal and Proceedings*  
1218 *of the Royal Society of New South Wales* 113, Parts 3 and 4(317-318):81-87.
- 1219 132. Martin HA (1981) Stratigraphic palynology of the Castlereagh River valley, New  
1220 South Wales. *Journal and Proceedings of the Royal Society of New South Wales*  
1221 114(321-322):77-84.
- 1222 133. Mildenhall DC (2001) Pollen analysis of Pliocene-Pleistocene Kowai Formation  
1223 (Kurow Group), Mackenzie Basin, South Canterbury, New Zealand. *New Zealand*  
1224 *Journal of Geology and Geophysics* 44(1):97-104.
- 1225 134. Turnbull IM, Lindqvist JK, Mildenhall DC, Hornibrook NdB, & Beu AG (1985)  
1226 Stratigraphy and paleontology of Pliocene-Pleistocene sediments on Five Fingers  
1227 Peninsula, Dusky Sound, Fiordland. *New Zealand Journal of Geology &*  
1228 *Geophysics* 28:217-231.
- 1229 135. Mildenhall D & Suggate RP (1981) Palynology and age of the Tadmor Group (Late  
1230 Miocene-Pliocene) and Porika Formation (early Pleistocene), South Island, New  
1231 Zealand. *New Zealand Journal of Geology & Geophysics* 24:515-528.
- 1232 136. Mildenhall DC (2003) Deep-sea record of Pliocene and Pleistocene terrestrial  
1233 palynomorphs from offshore eastern New Zealand (ODP Site 1123, Leg 181). *New*  
1234 *Zealand Journal of Geology and Geophysics* 46(3):343-361.
- 1235 137. Mildenhall DC, Hollis CJ, & Naish TR (2004) Orbitally-influenced vegetation record  
1236 of the Mid-Pleistocene climate transition, offshore eastern New Zealand (ODP Leg  
1237 181, Site 1123). *Marine Geology* 205(1-4):87-111.
- 1238 138. Zaklinskaya ED (1978) Palynological information from Late Pliocene-Pleistocene  
1239 deposits recovered by deep-sea drilling in the region of the island of Timor. *Review*  
1240 *of Palaeobotany and Palynology* 26:227-241.
- 1241 139. Khan AA (1976) Palynology of Tertiary sediments from Papua New Guinea. II.  
1242 Gymnosperm pollen from upper Tertiary sediments. *Australian Journal of Botany*  
1243 24:783-791.
- 1244 140. Khan AA (1976) Palynology of Tertiary sediments from Papua New Guinea. I. New  
1245 form genera and species from upper Tertiary sediments. *Australian Journal of Botany*  
1246 24:753-781.
- 1247 141. Caratini C & Tissot C (1988) Paleogeographical evolution of the Mahakam Delta in  
1248 Kalimantan, Indonesia during the Quaternary and Late Pliocene. *Review of*  
1249 *Palaeobotany and Palynology* 55:217-228.
- 1250 142. Reed KE (1997) Early hominid evolution and ecological change through the African  
1251 Plio-Pleistocene. *Journal of Human Evolution* 32(2-3):289-322.

- 1252 143. Bonnefille R & Riollet G (1987) Palynological spectra from the Upper Laetoli Beds.  
1253 *Laetoli: A Pliocene Site in Northern Tanzania*, eds Leakey MD & Harris JH  
1254 (Clarendon Press, Oxford), pp 52-61.
- 1255 144. Schrenk F, Bromage TG, Gorthner A, & Sandrock O (1995) Paleocology of the  
1256 Malawi Rift: Vertebrate and invertebrate faunal contexts of the Chiwondo Beds,  
1257 northern Malawi. *Journal of Human Evolution* 28:59-70.
- 1258 145. Dowsett H & Willard D (1996) Southeast Atlantic marine and terrestrial response to  
1259 middle Pliocene climate change. *Marine Micropaleontology* 27:181-193.
- 1260 146. Dupont LM, Donner B, Vidal L, Pérez EM, & Wefer G (2005) Linking desert  
1261 evolution and coastal upwelling: Pliocene climate change in Namibia. *Geology*  
1262 33:461-464.
- 1263 147. Tankard AJ & Roger J (1978) Late Cenozoic palaeoenvironments of the west coast of  
1264 Southern Africa. *Journal of Biogeography* 5:319-337.
- 1265 148. Roberts DL, *et al.* (2011) Regional and global context of the Late Cenozoic  
1266 Langebaanweg (LBW) palaeontological site: West Coast of South Africa. *Earth-*  
1267 *Science Reviews* 106(3-4):191-214.
- 1268 149. Bamford M (1999) Pliocene fossil woods from an early hominid cave deposit,  
1269 Sterkfontein, South Africa. *South African Journal of Science* 95:231-237.
- 1270 150. Gaupp R, Kött A, & Wörner G (1999) Palaeoclimatic implications of Mio-Pliocene  
1271 sedimentation in the high-altitude intra-arc Lauca Basin of northern Chile.  
1272 *Palaeogeography, Palaeoclimatology, Palaeoecology* 151(1-3):79-100.
- 1273 151. Pascual R & Ortiz Jaureguizar E (1990) Evolving climates and mammal faunas in  
1274 Cenozoic South America. *Journal of Human Evolution* 19:23-60.
- 1275 152. Zarate MA & Fasano JL (1989) The Plio-Pleistocene record of the central eastern  
1276 Pampas, Buenos Aires province, Argentina: The Chapadmalal case study.  
1277 *Palaeogeography, Palaeoclimatology, Palaeoecology* 72(0):27-52.
- 1278 153. Carvalho MA (2003) Paleocological and paleoclimatic studies based on palynology  
1279 of Pliocene and Pleistocene sediments from the Foz do Amazonas, Brazil. *Neues*  
1280 *Jahrbuch für Geologie und Paläontologie* 229:1-18.  
1281

Figure S1

A

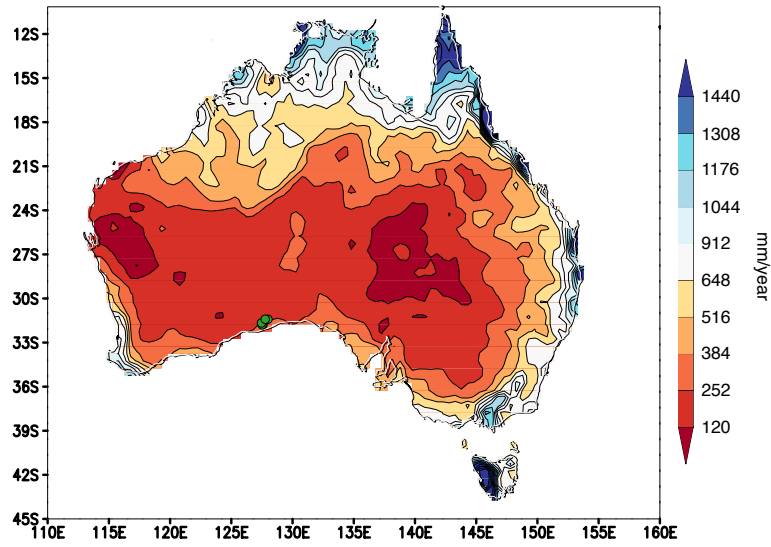

B

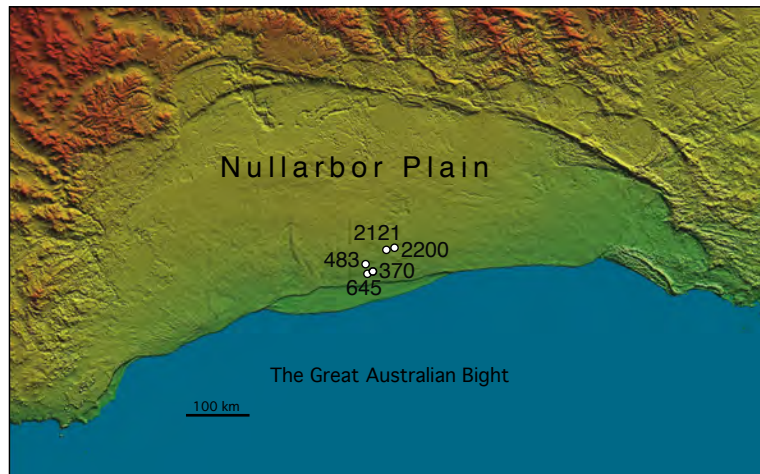

C

| Cave number (name)     | Location        | MAP (mm) | MAT (°C) |
|------------------------|-----------------|----------|----------|
| 370 (Matilda)          | 31.8°S, 127.8°E | 262      | 17.6     |
| 483 (Hurricane Hole)   | 31.7°S, 127.7°E | 251      | 17.6     |
| 645 (Windy Hollow)     | 31.8°S, 127.7°E | 265      | 17.5     |
| 2200 (Leaena's Breath) | 31.4°S, 128.1°E | 239      | 17.8     |
| 2121 (Last Tree Cave)  | 31.4°S, 127.9°E | 233      | 17.8     |



Figure S2

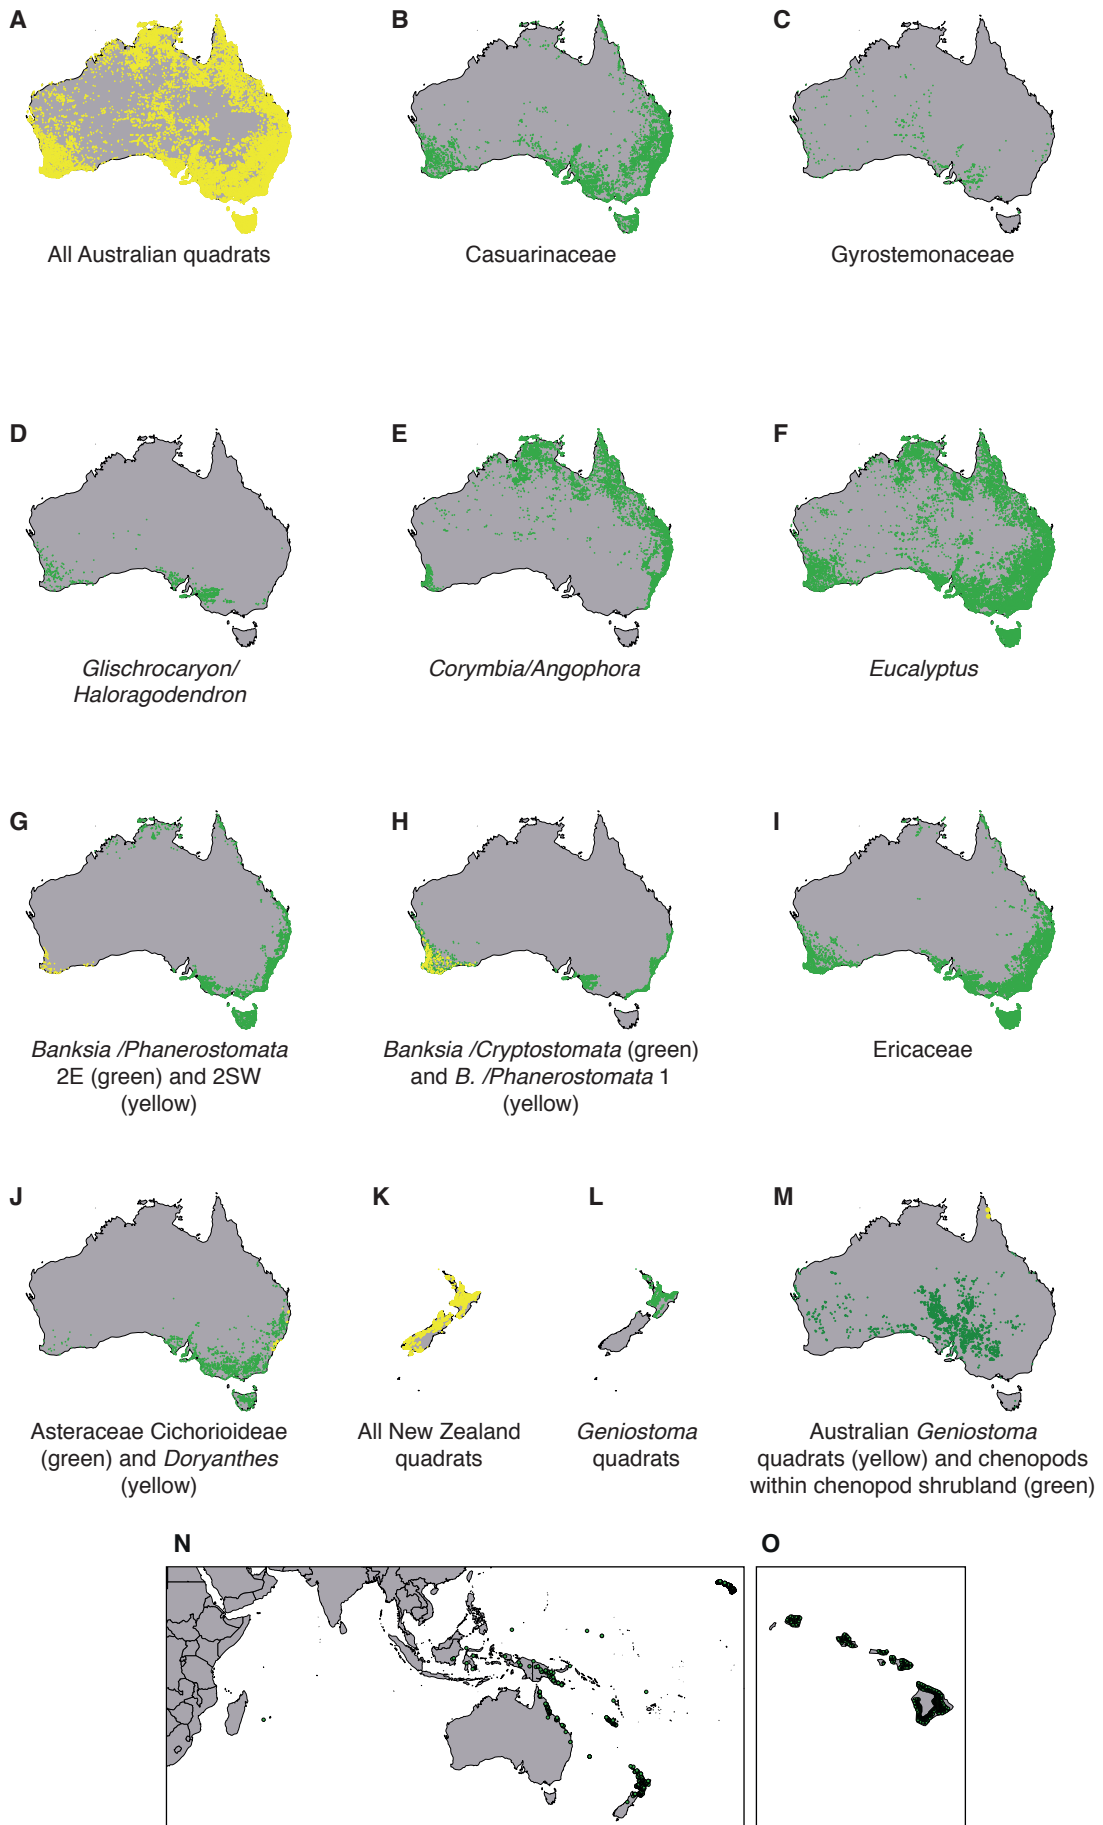

Figure S3

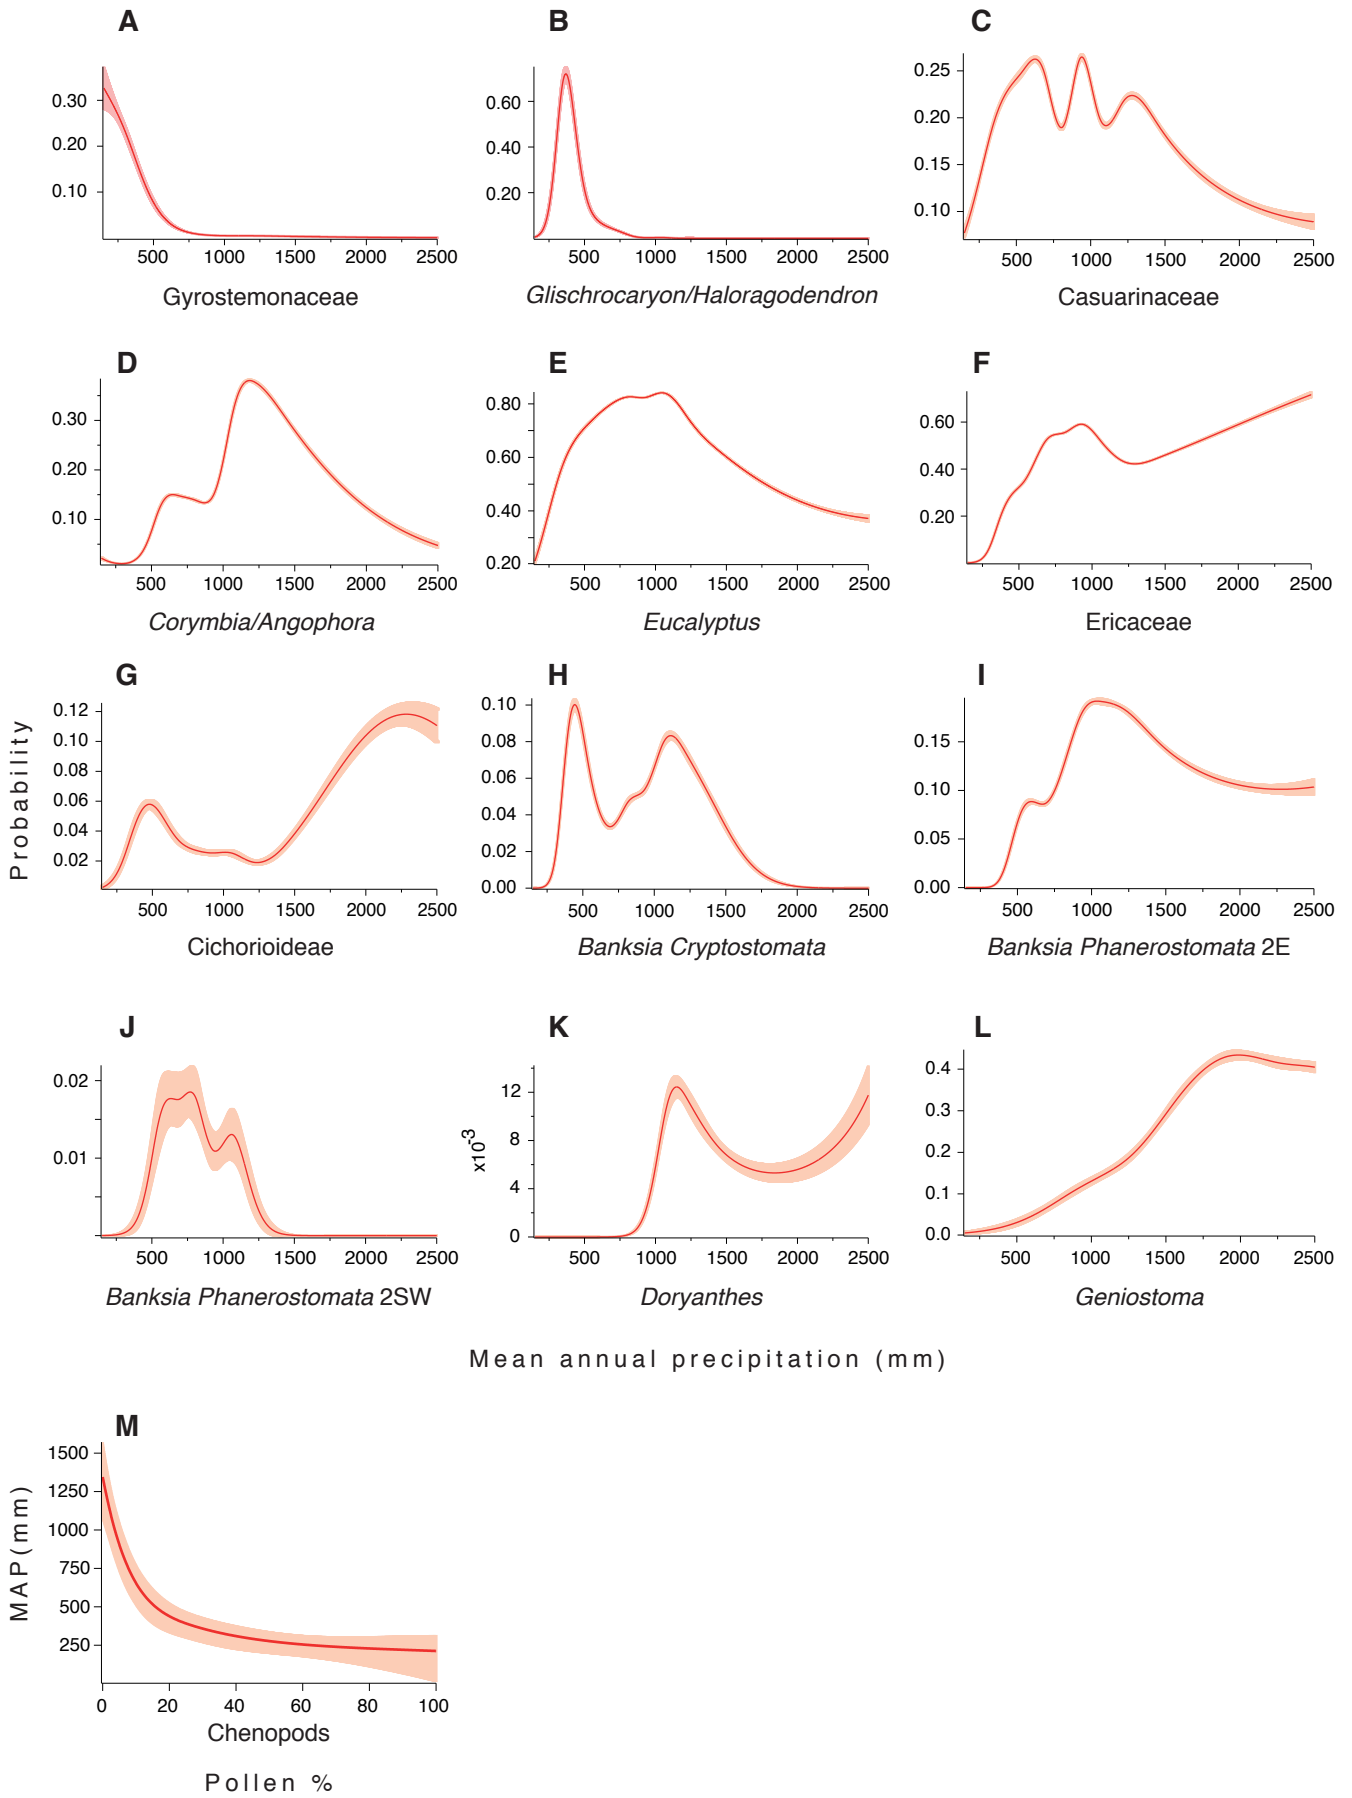

Figure S4

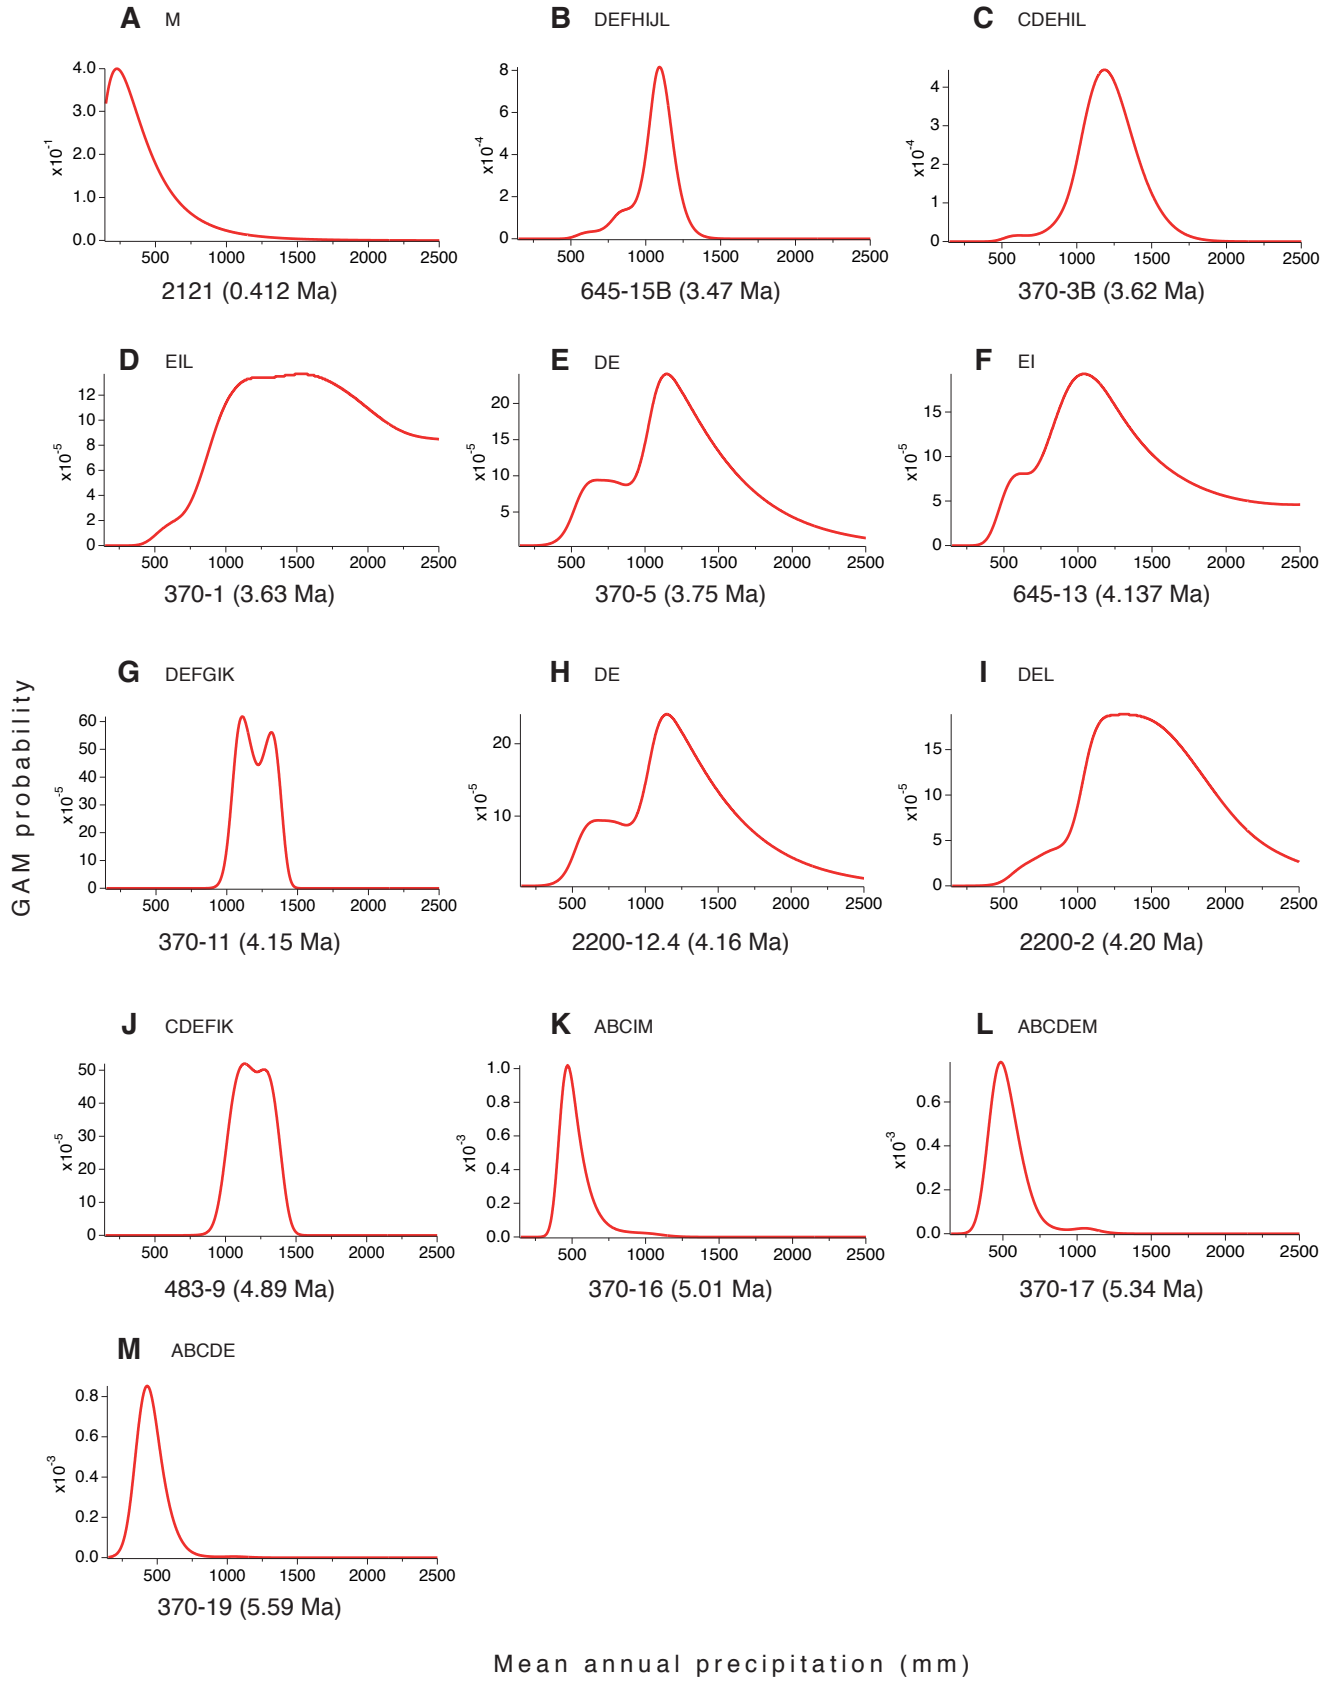

Figure S5

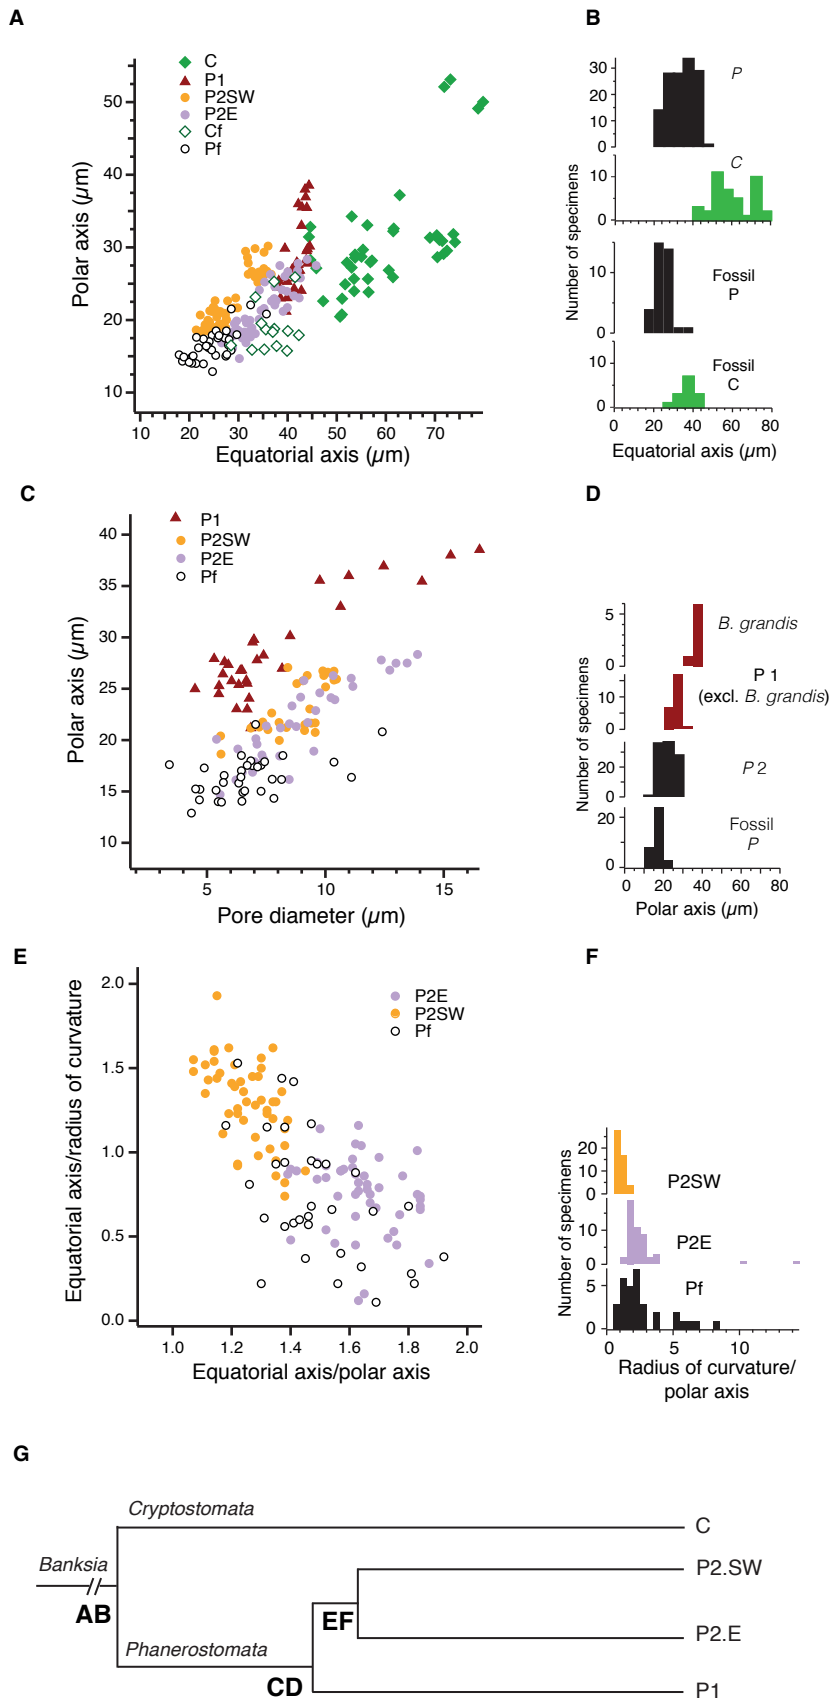

Figure S6

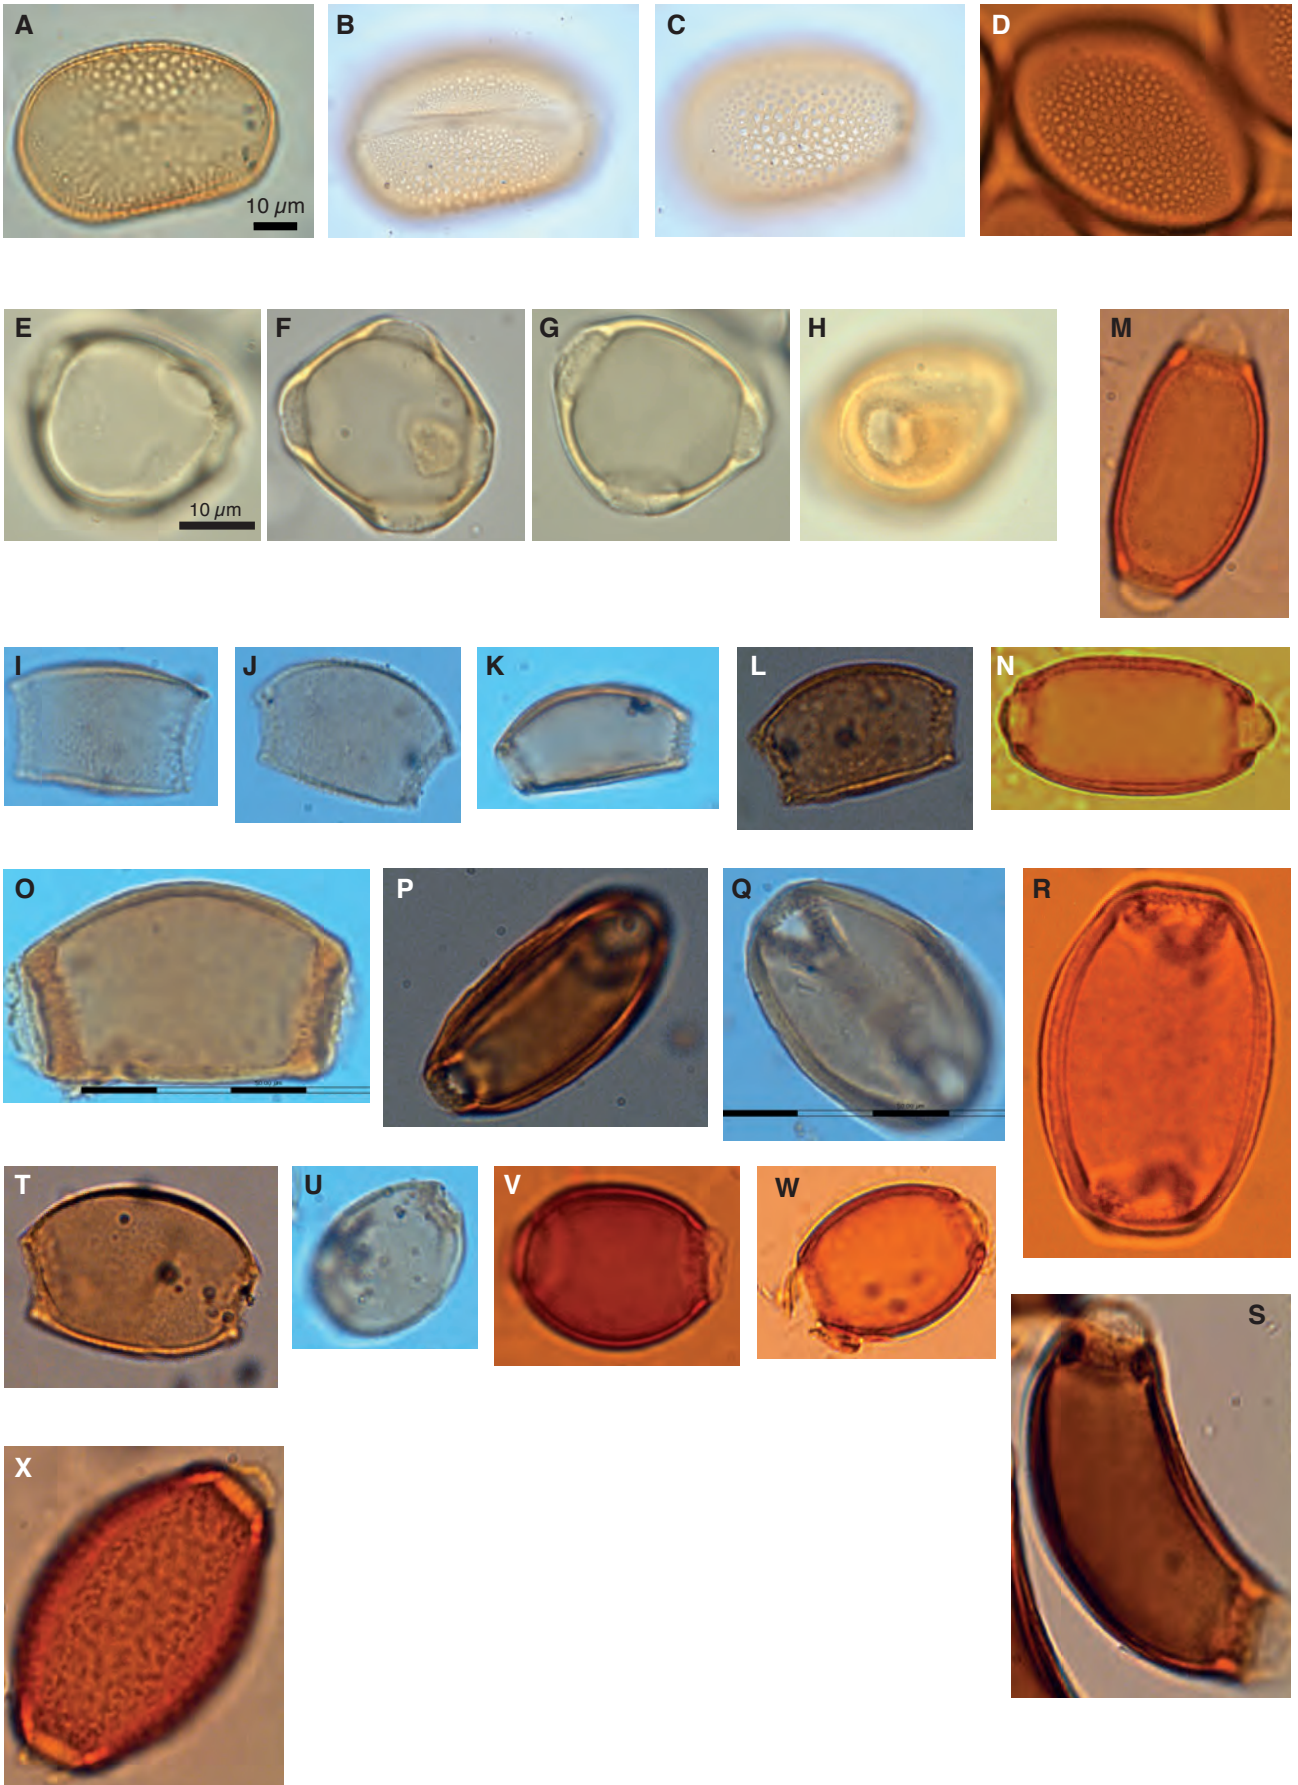

Supplement: pnas.1520188113.sapp.pdf [file pnas.1520188113.sapp.pdf]
